# Supplementary material for: Validity of a Cochrane Systematic Review and meta-analysis for determining the safety of vitamin E
Source: Springer Nature journal article supplement (doi:10.1186/s12906-017-1906-x), 2017-08-16

Figure S1 - A11 - ATBC 85-01 as per Bjelakovic 2012 (3 cell)

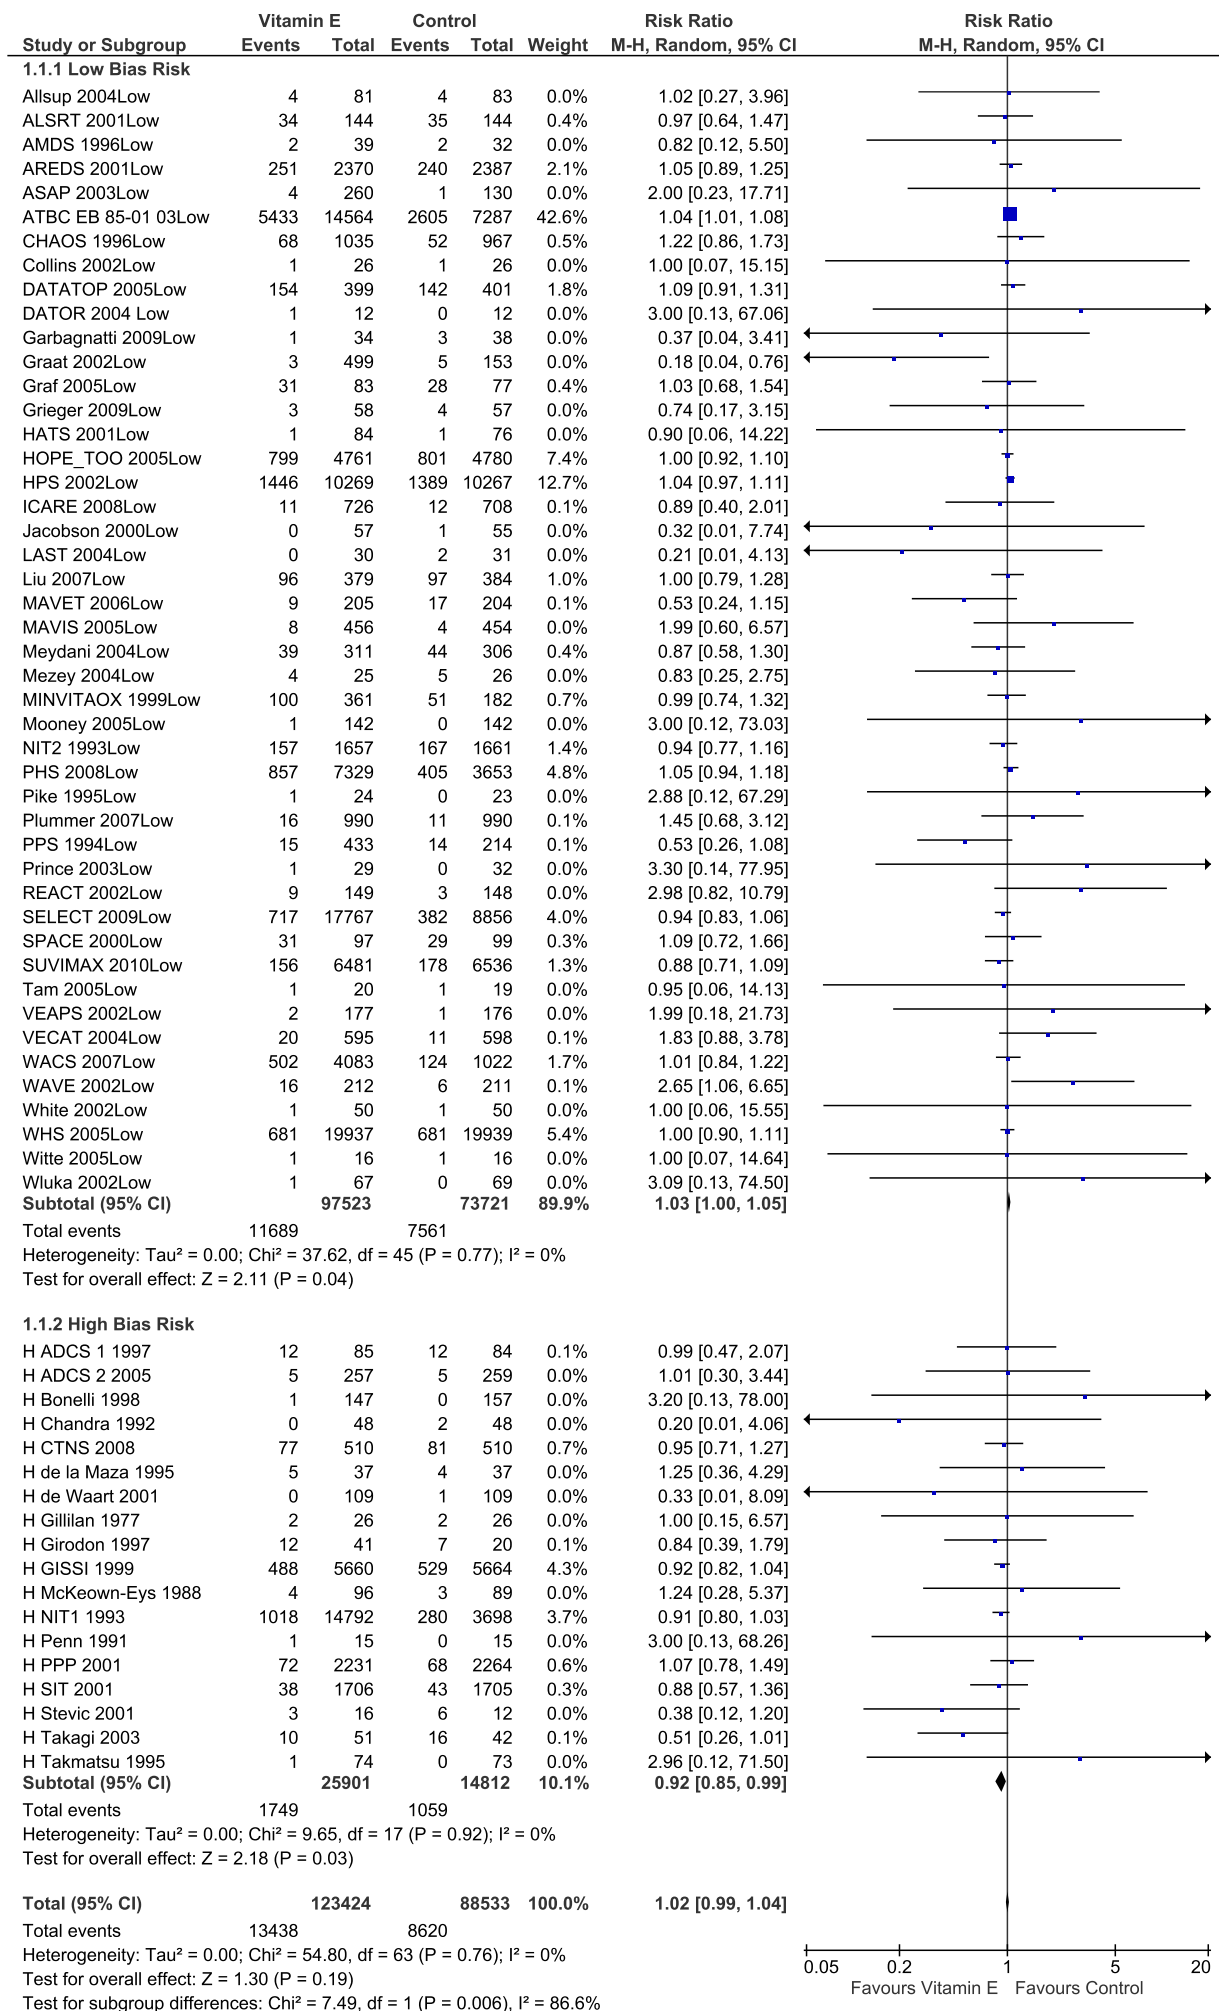

Figure S2 - A11 - Minus ATBC 85-01

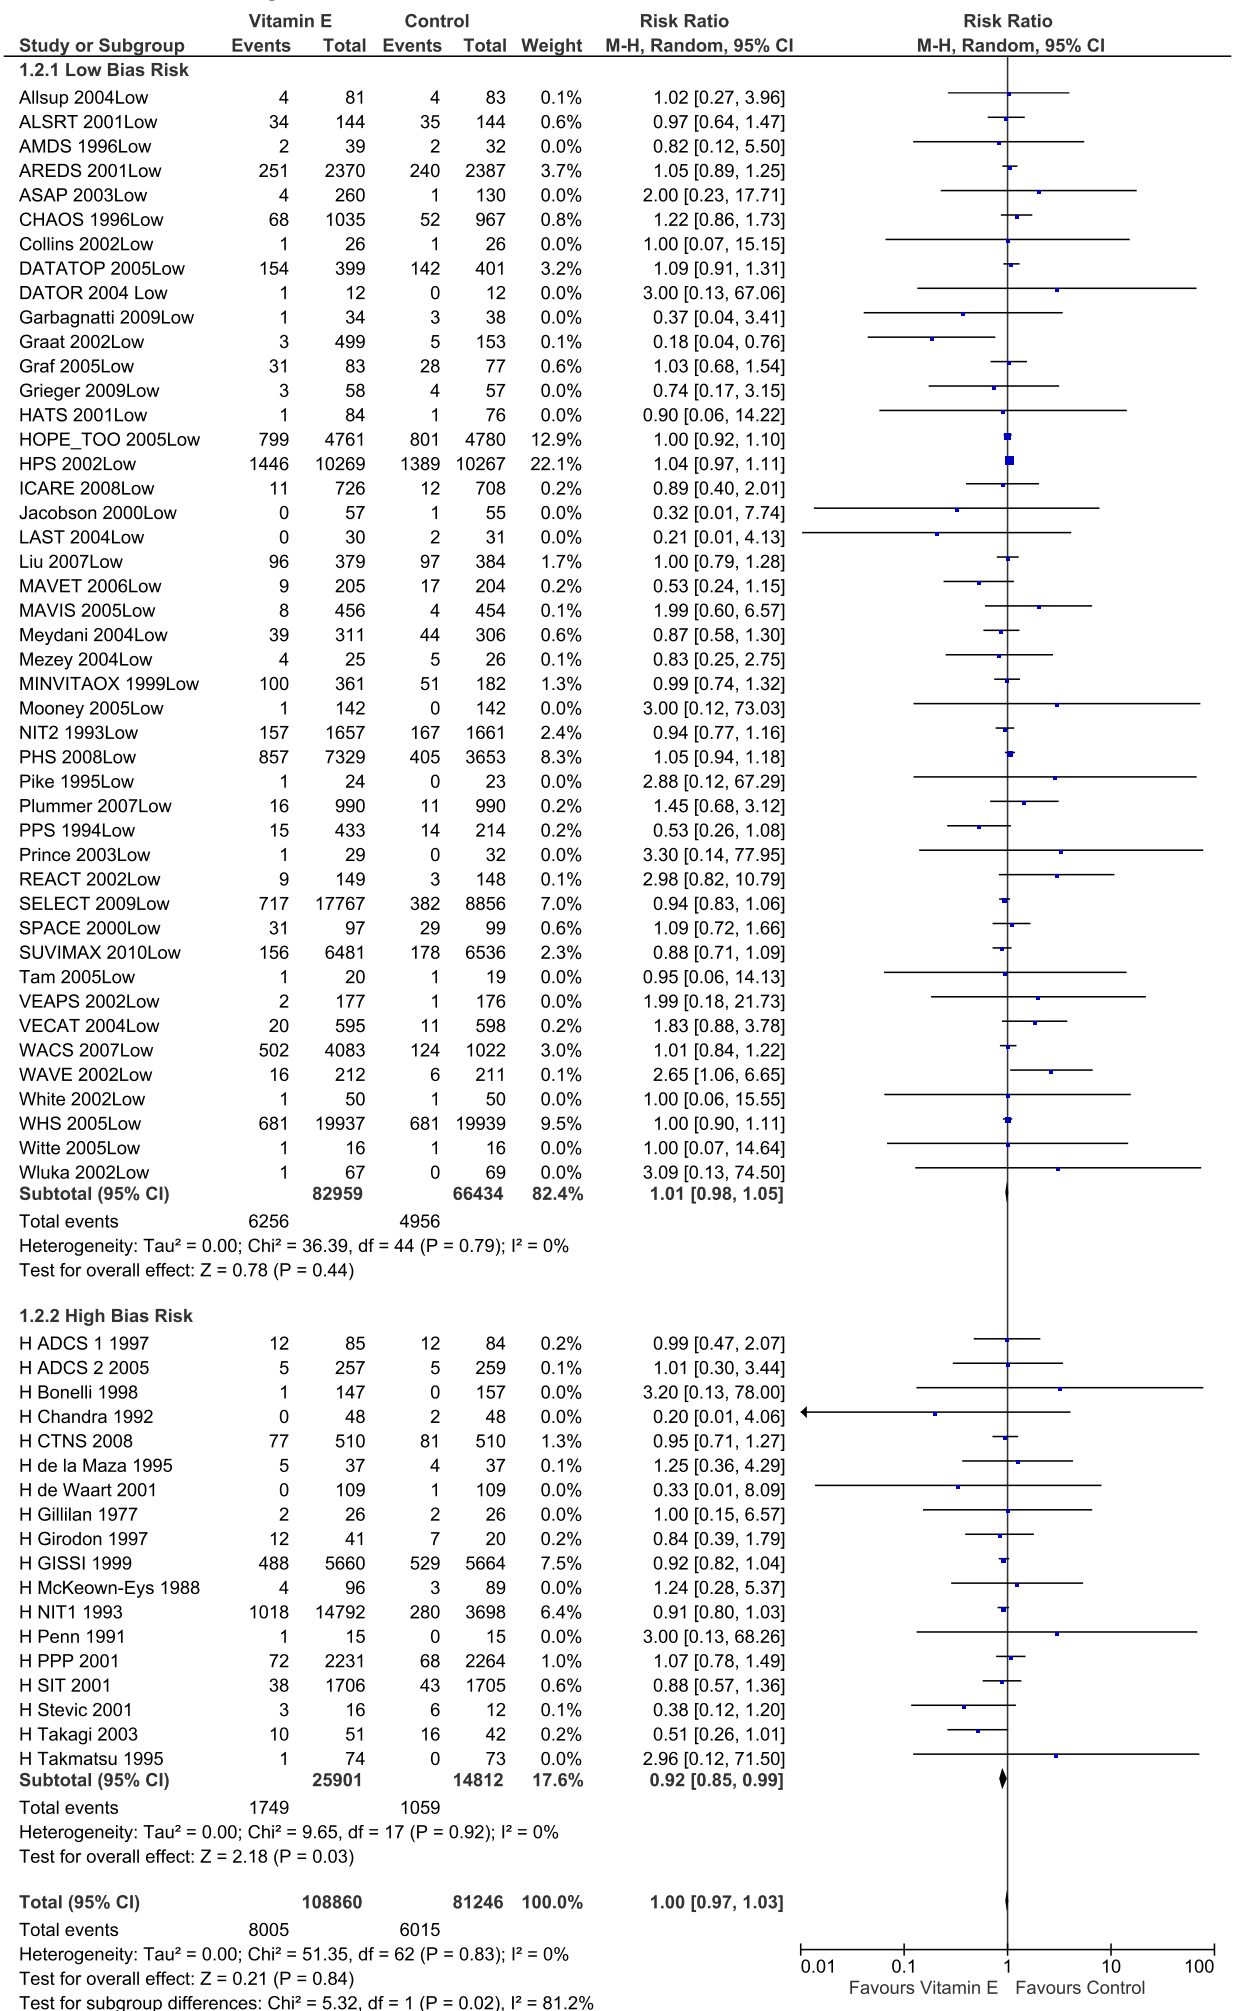

Figure S3 - A11 - Plus Fictitious Trial

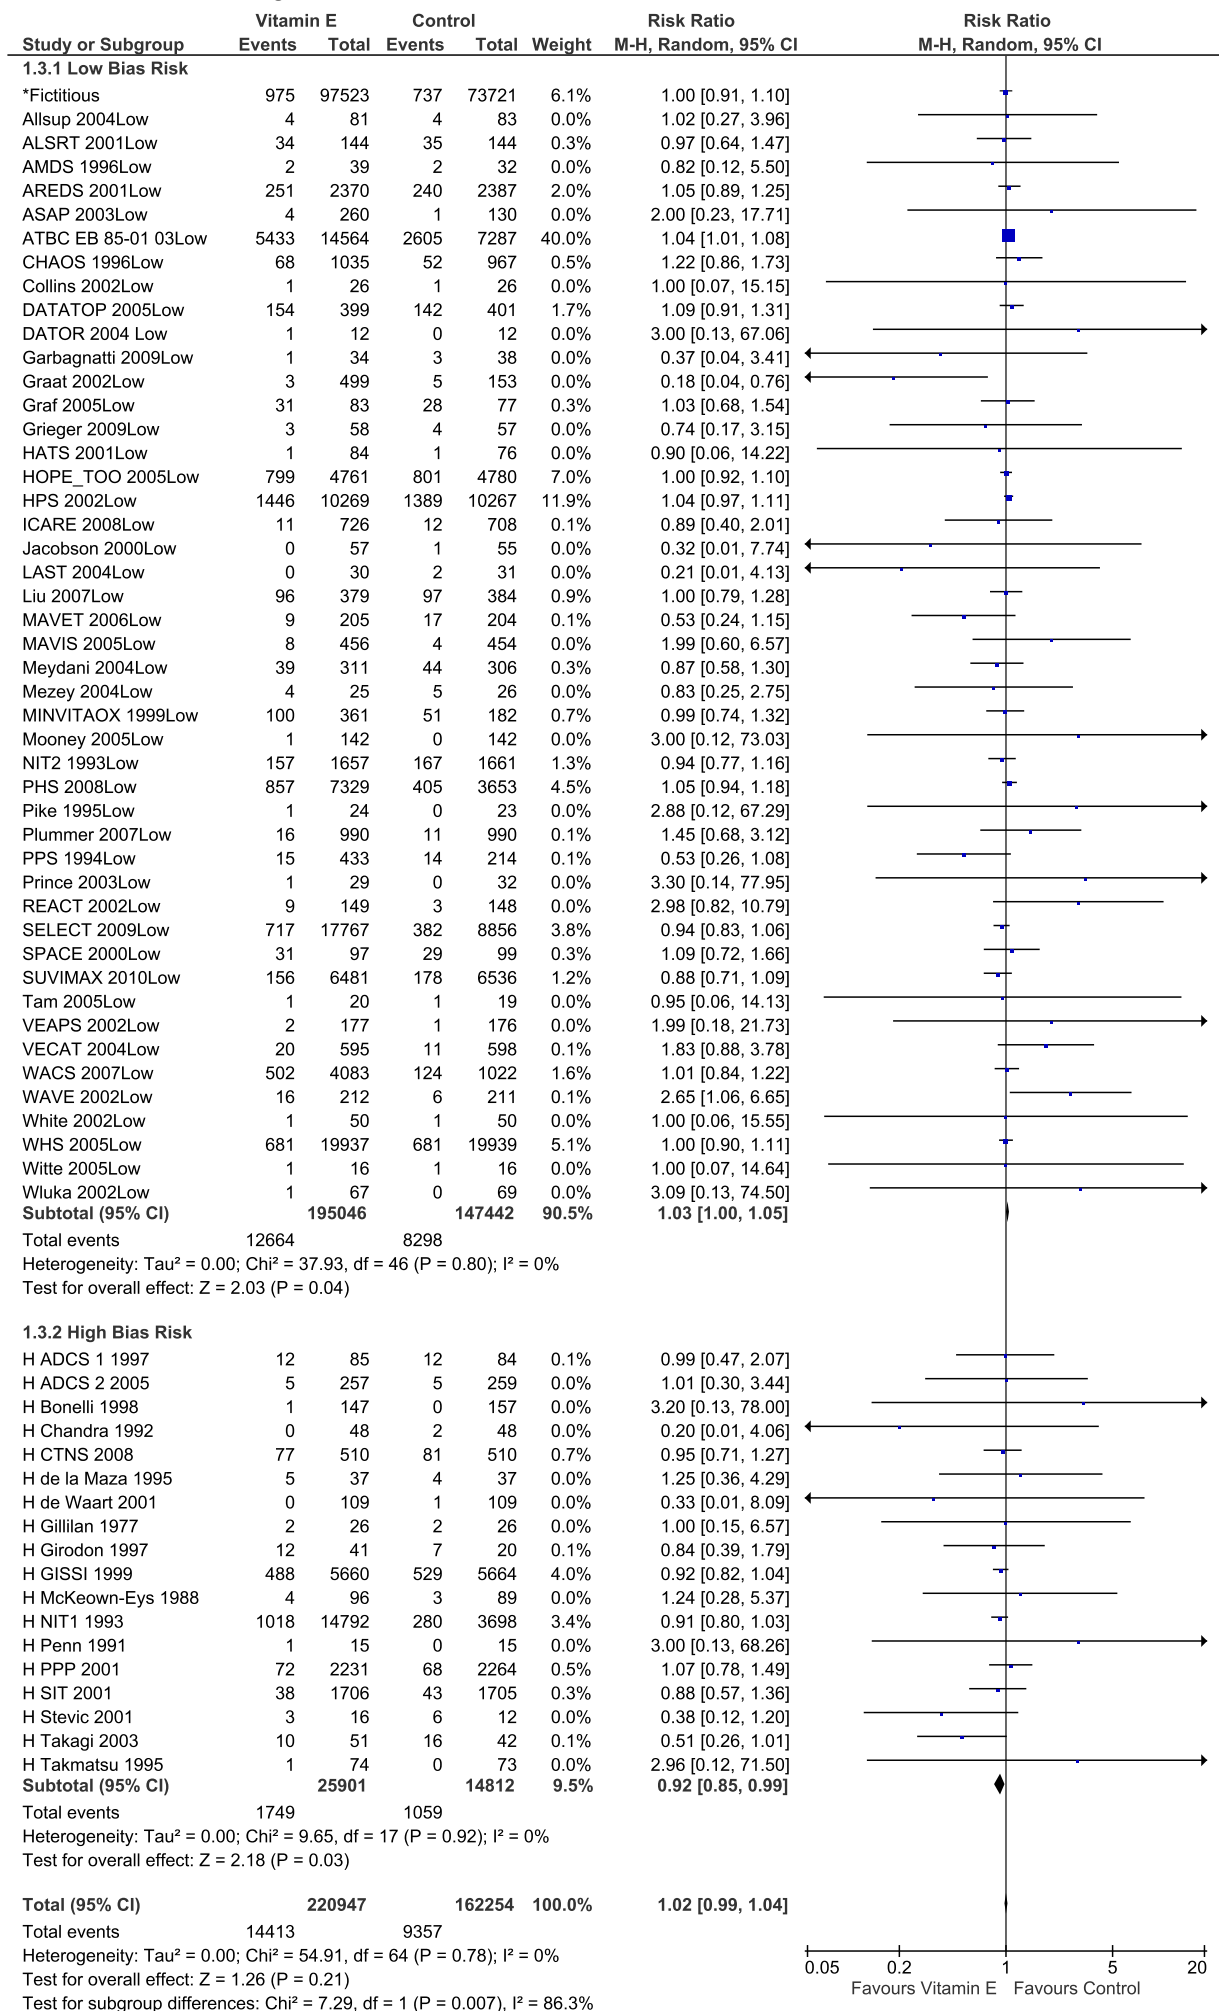

Figure S4 - A11 - ATBC 85-93 "At the Margins" (4 cell)

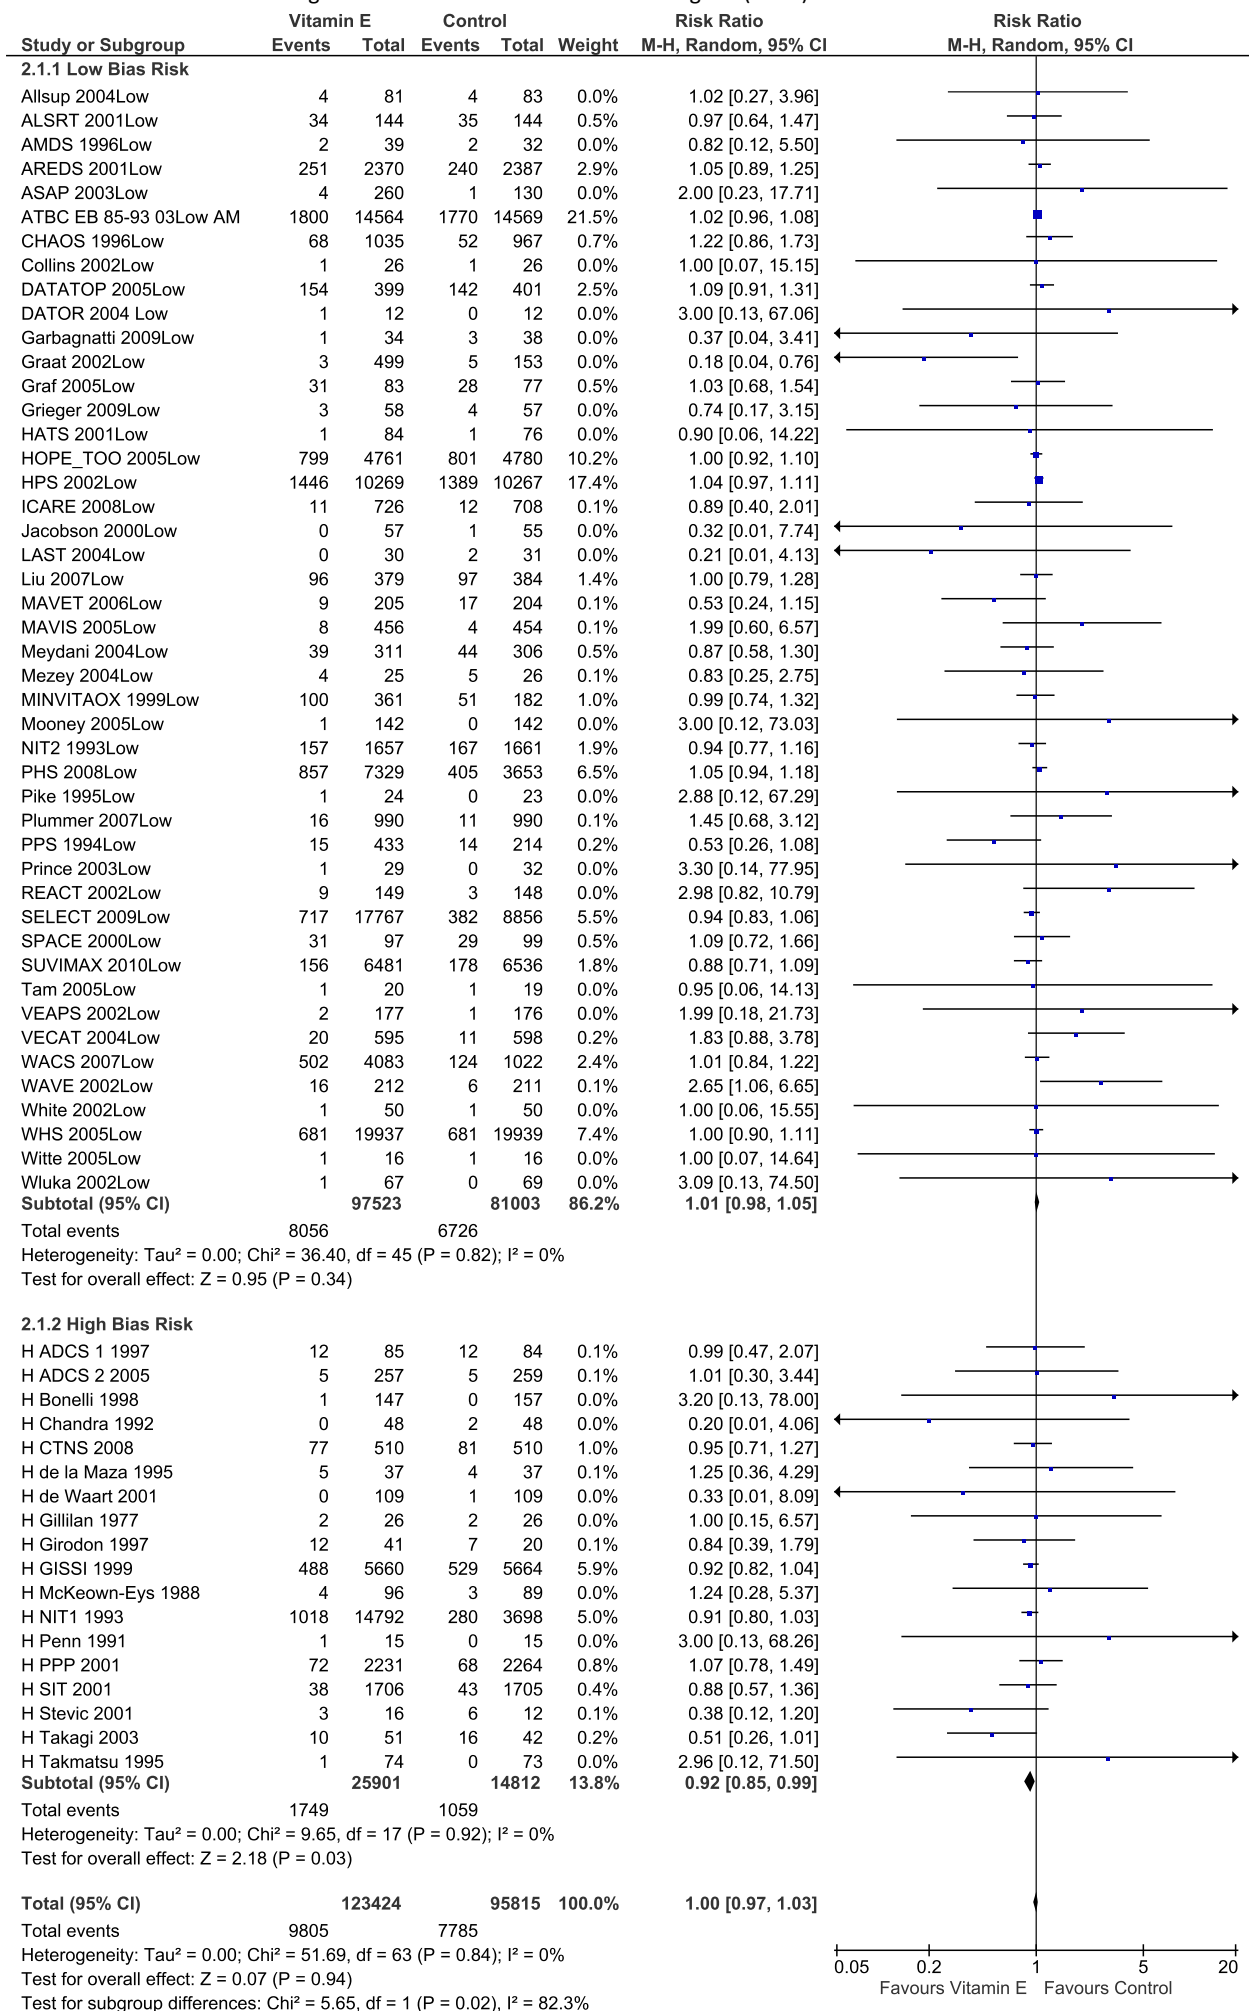

Figure S5 - A11 - ATBC 85-96 "At the Margins" (4 cell)

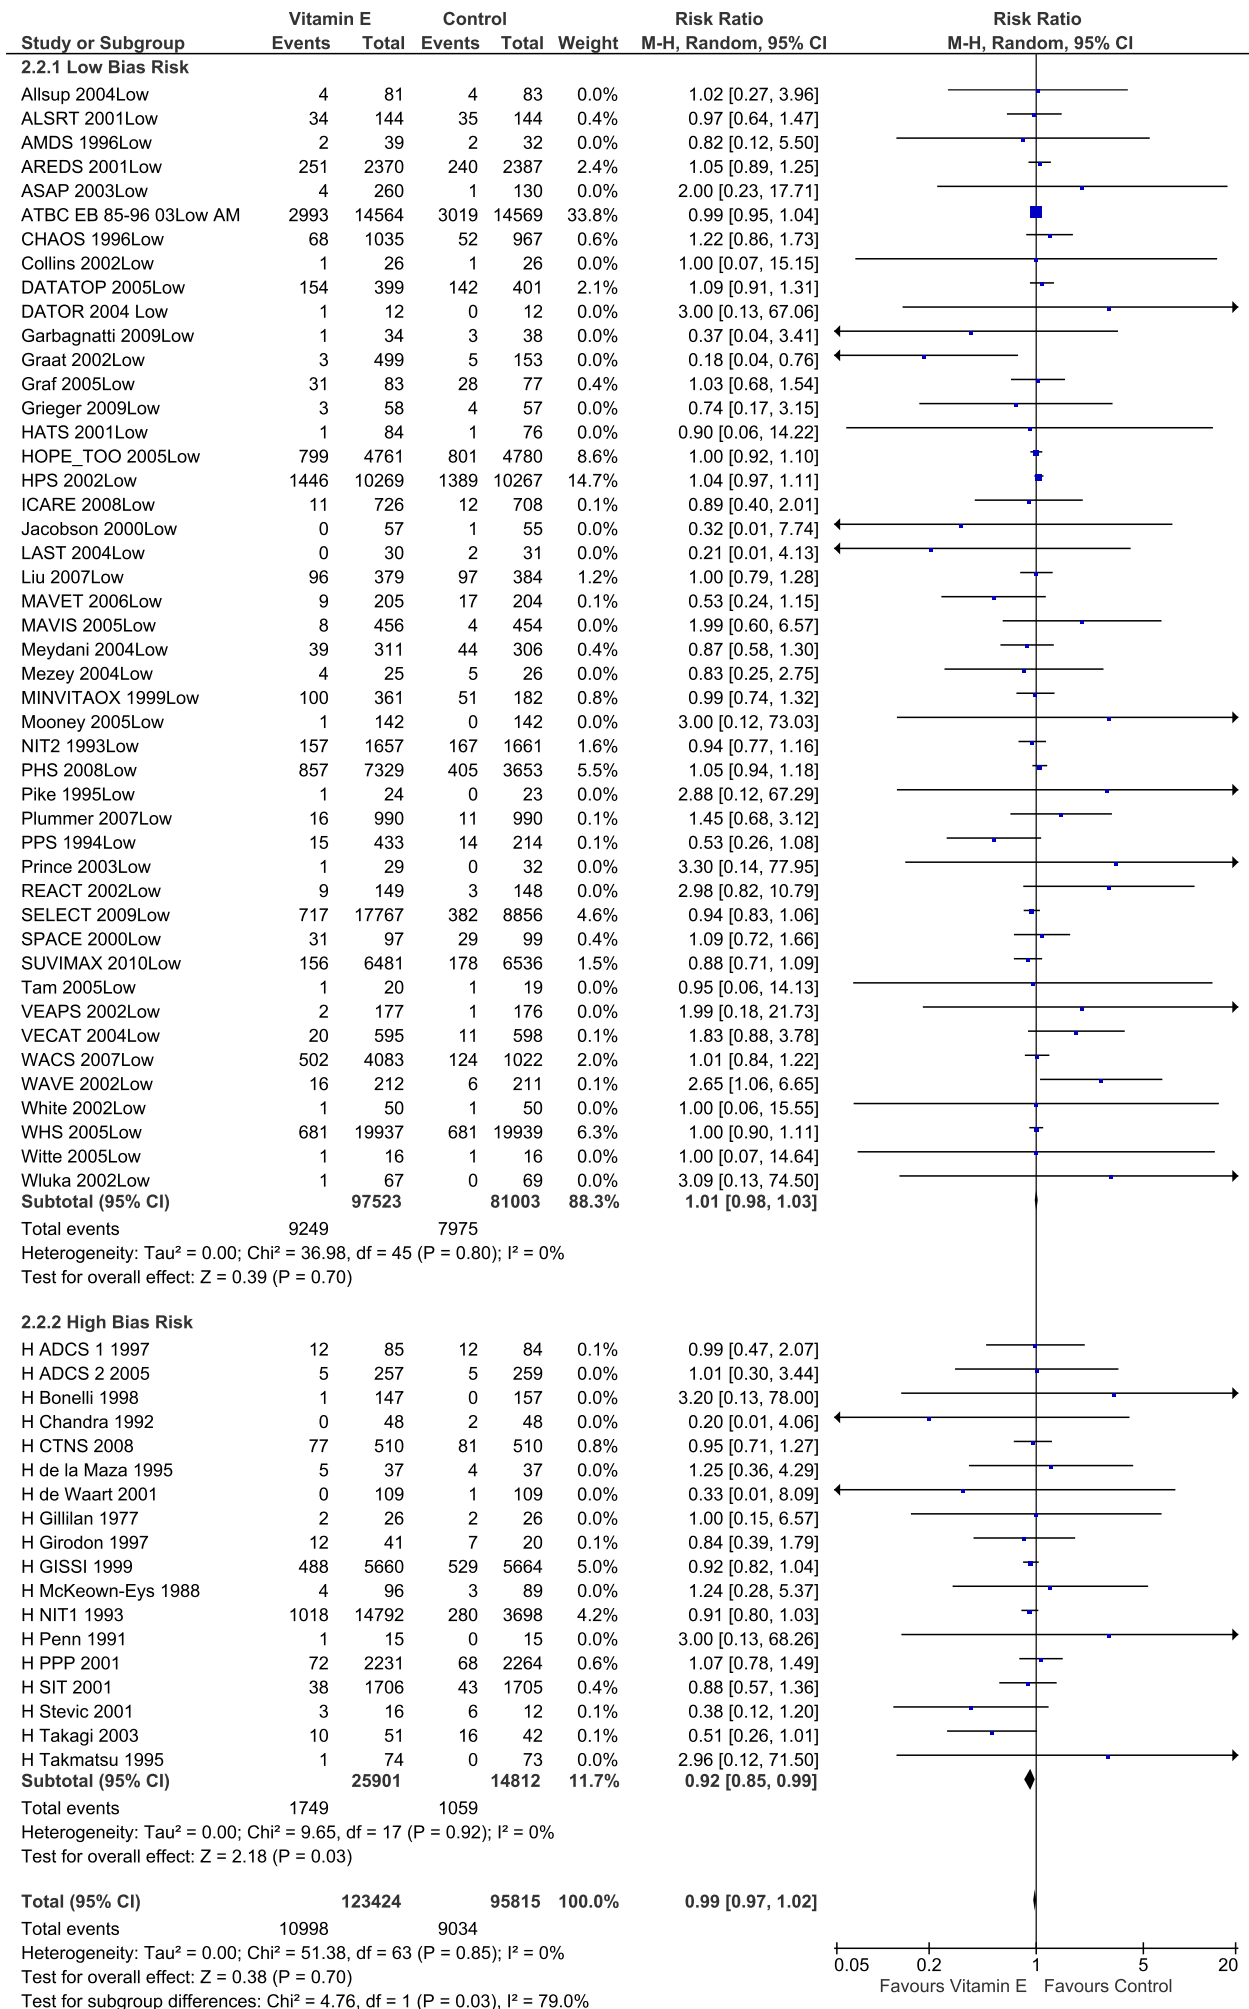

Figure S6 - A11 - ATBC 85-99 "At the Margins" (4 cell)

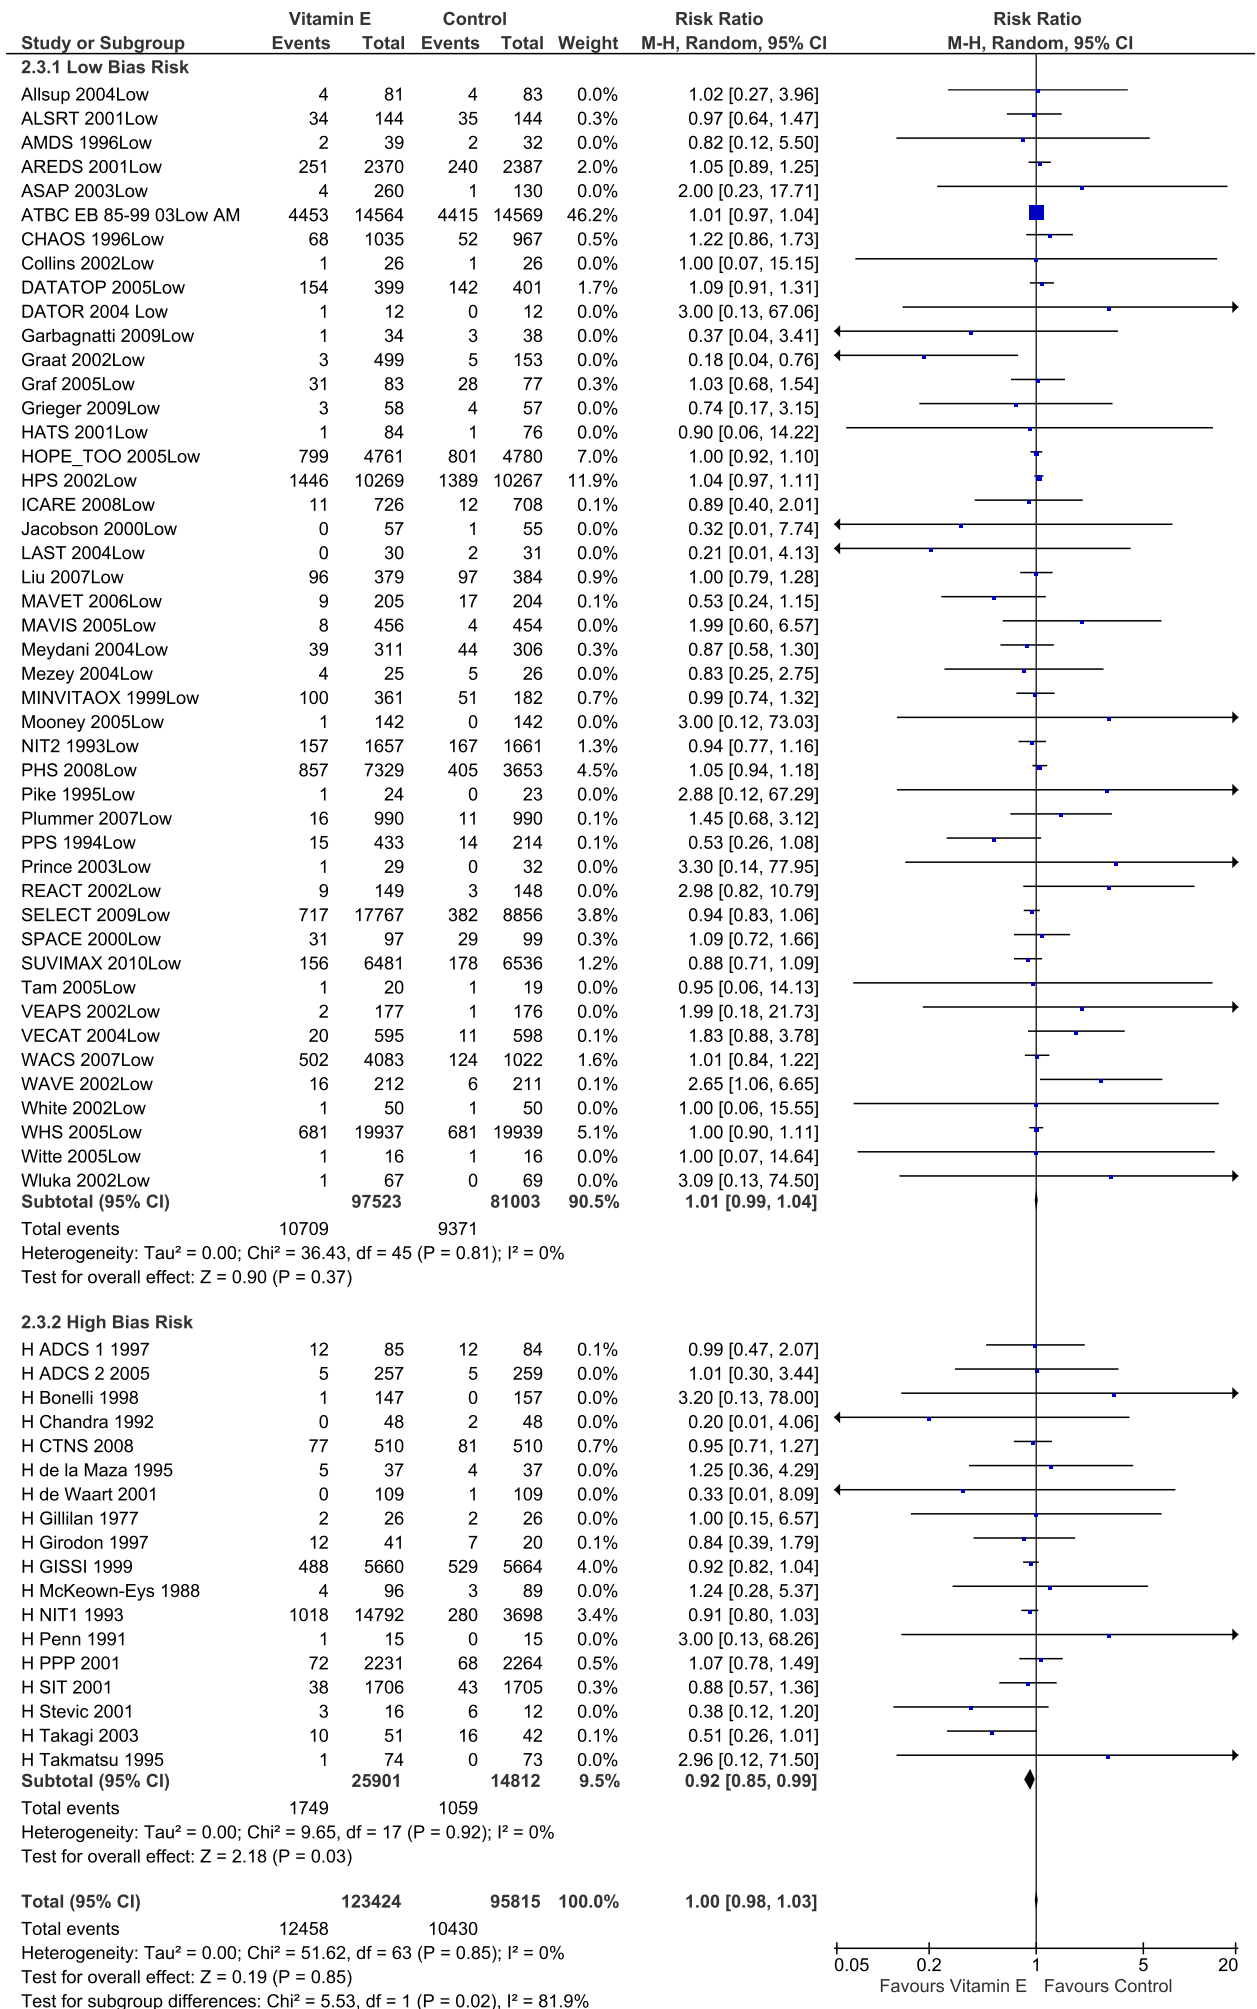

Figure S7 - A11 - ATBC 85-01 "At the Margins" (4 cell)

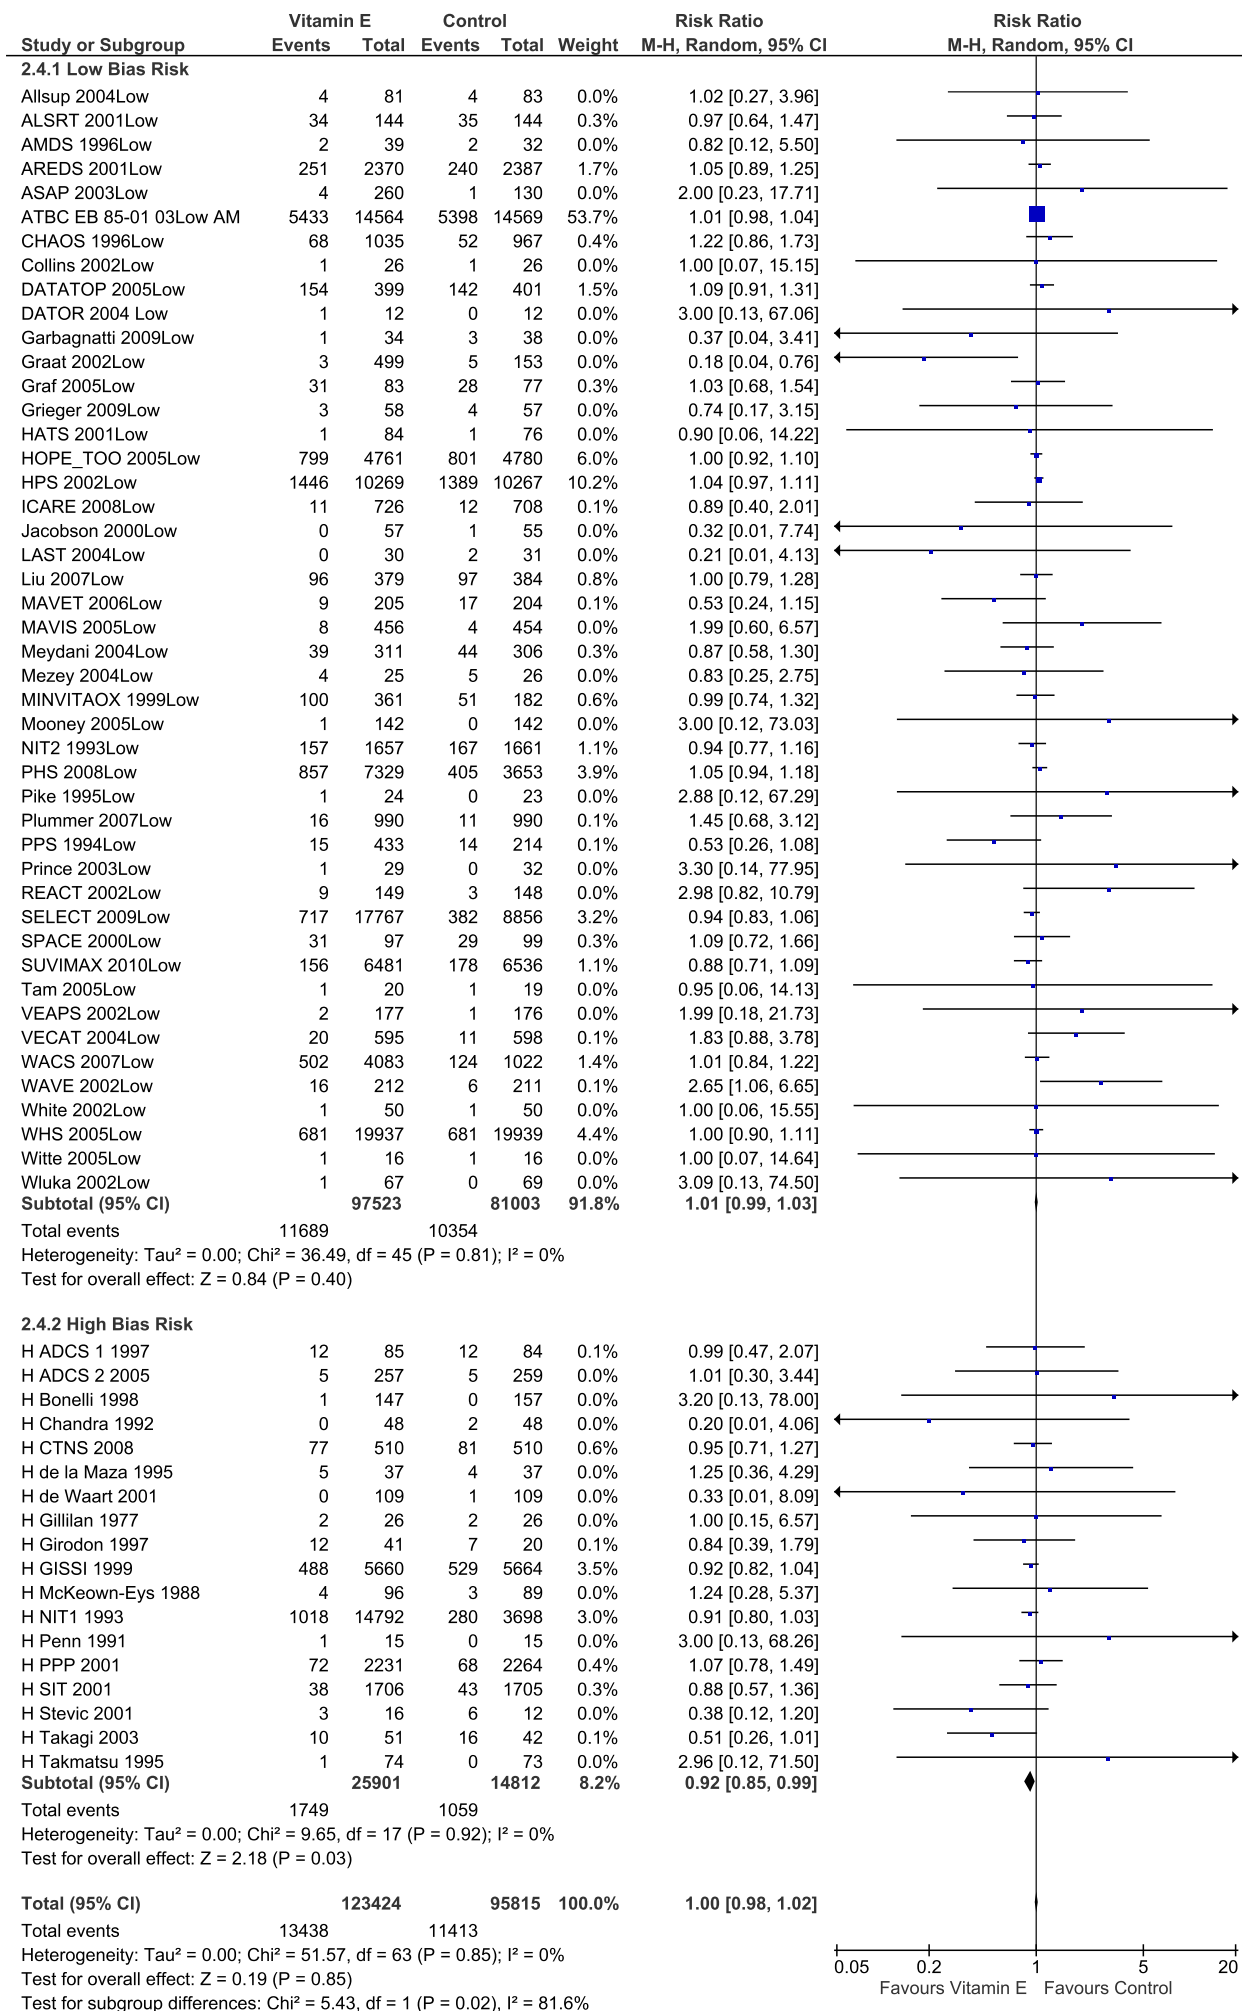

Figure S8 - A11 - ATBC 85-11 "At the Margins" (4 cell)

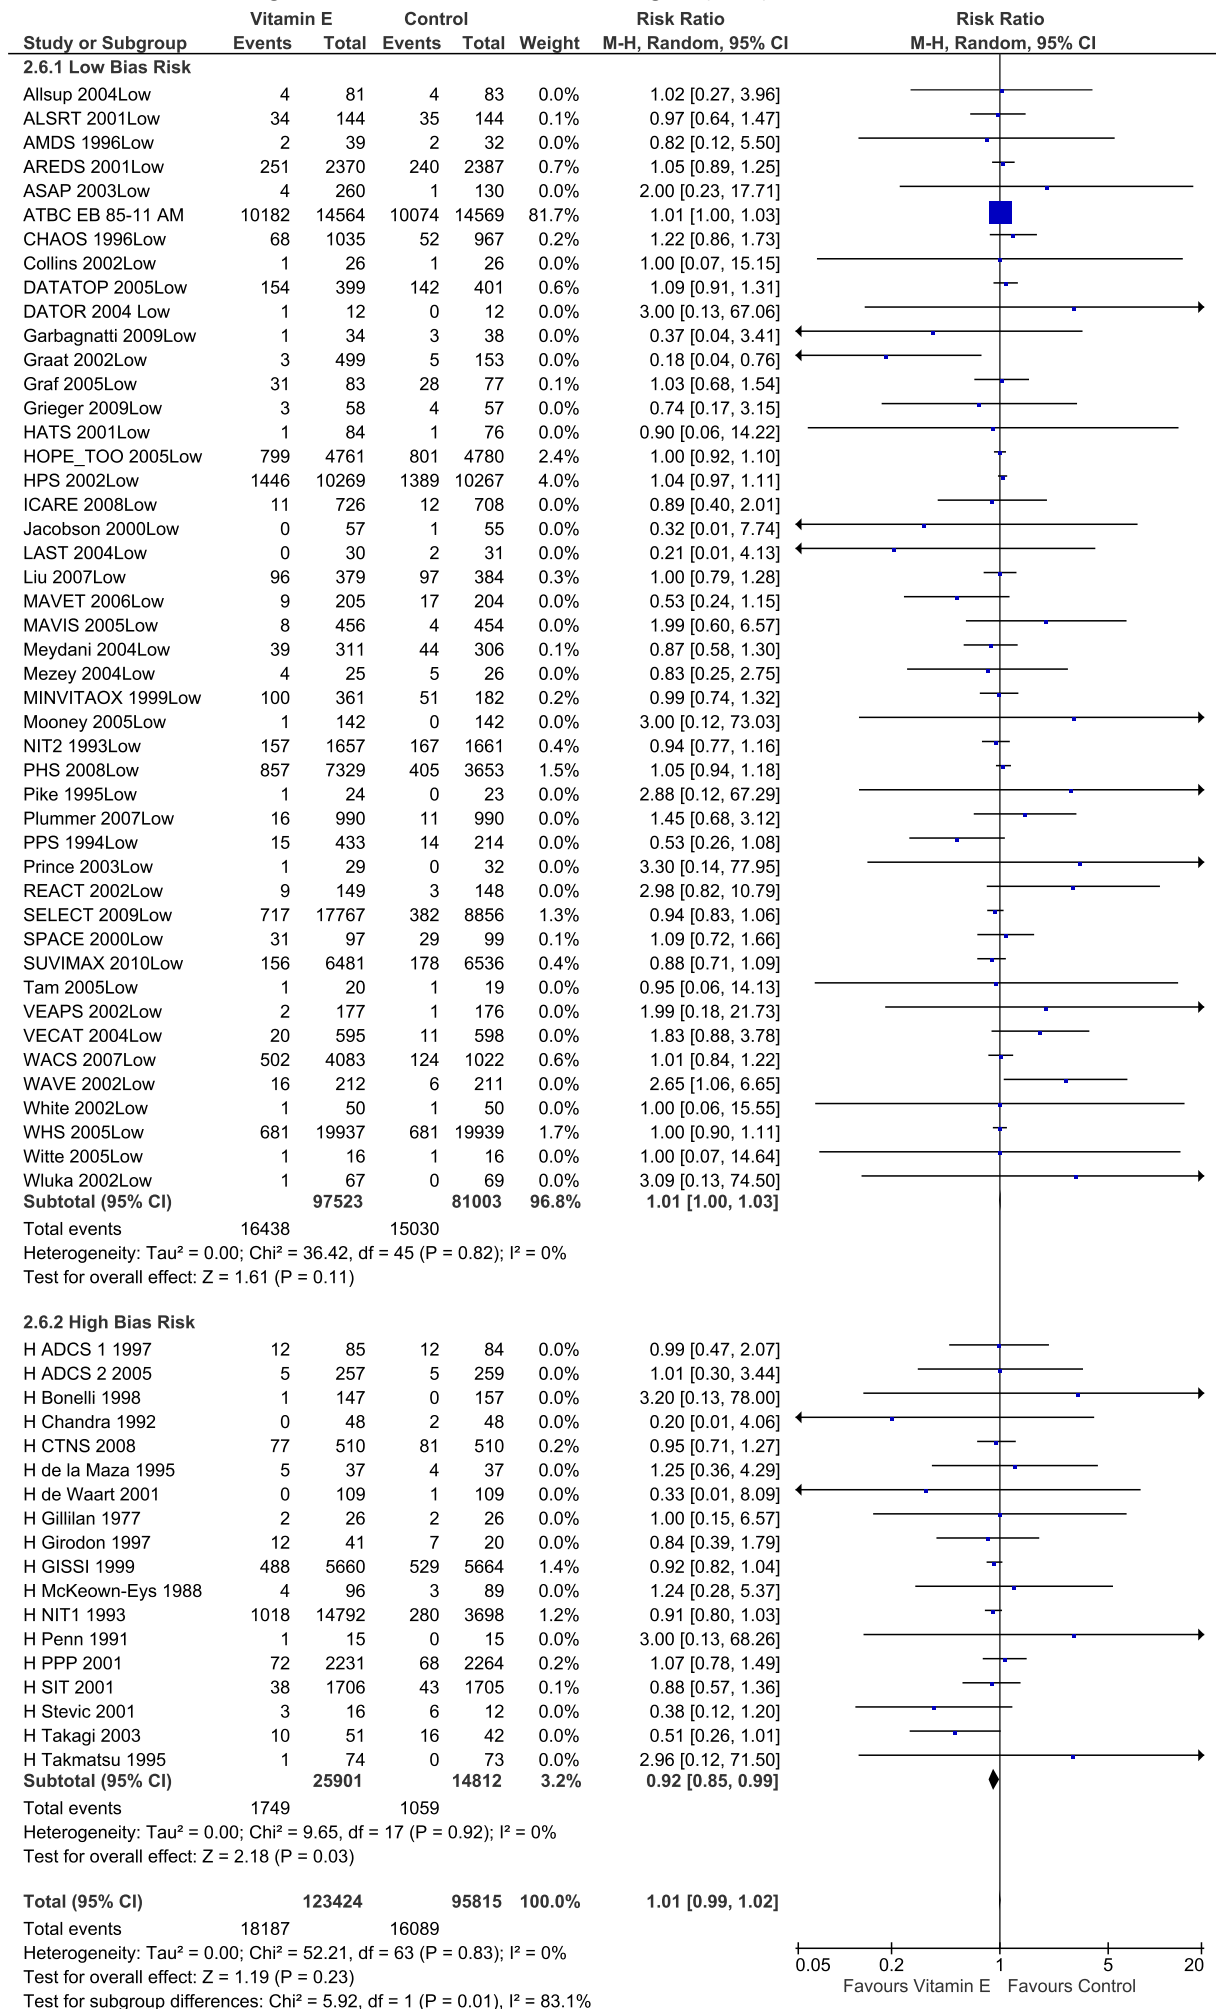



Figure S9 - A11 - ATBC 85-93 "Inside the Table" (2 cell)

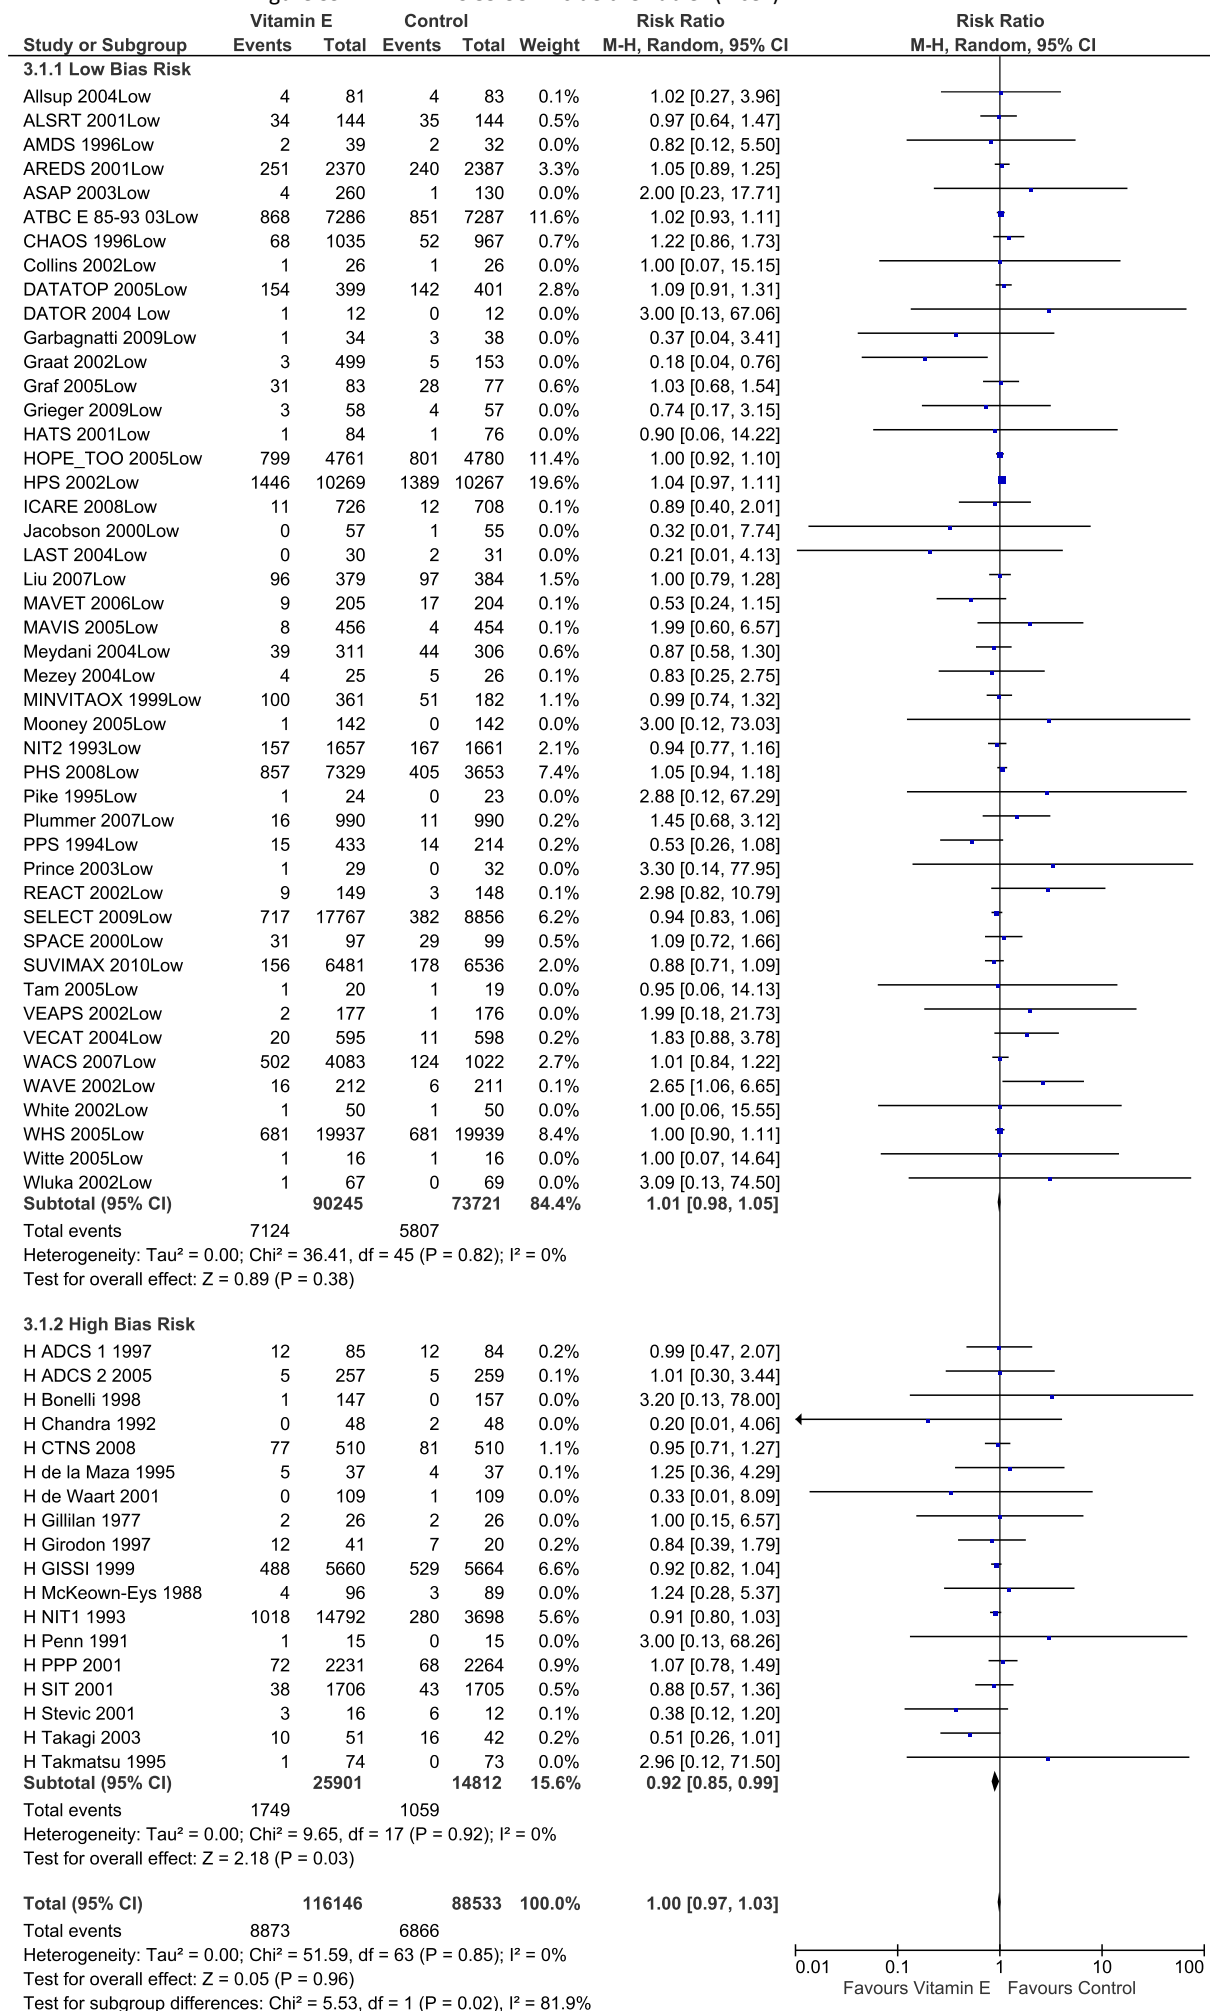

Figure S10 - A11 - ATBC 85-96 "Inside the Table" (2 cell)

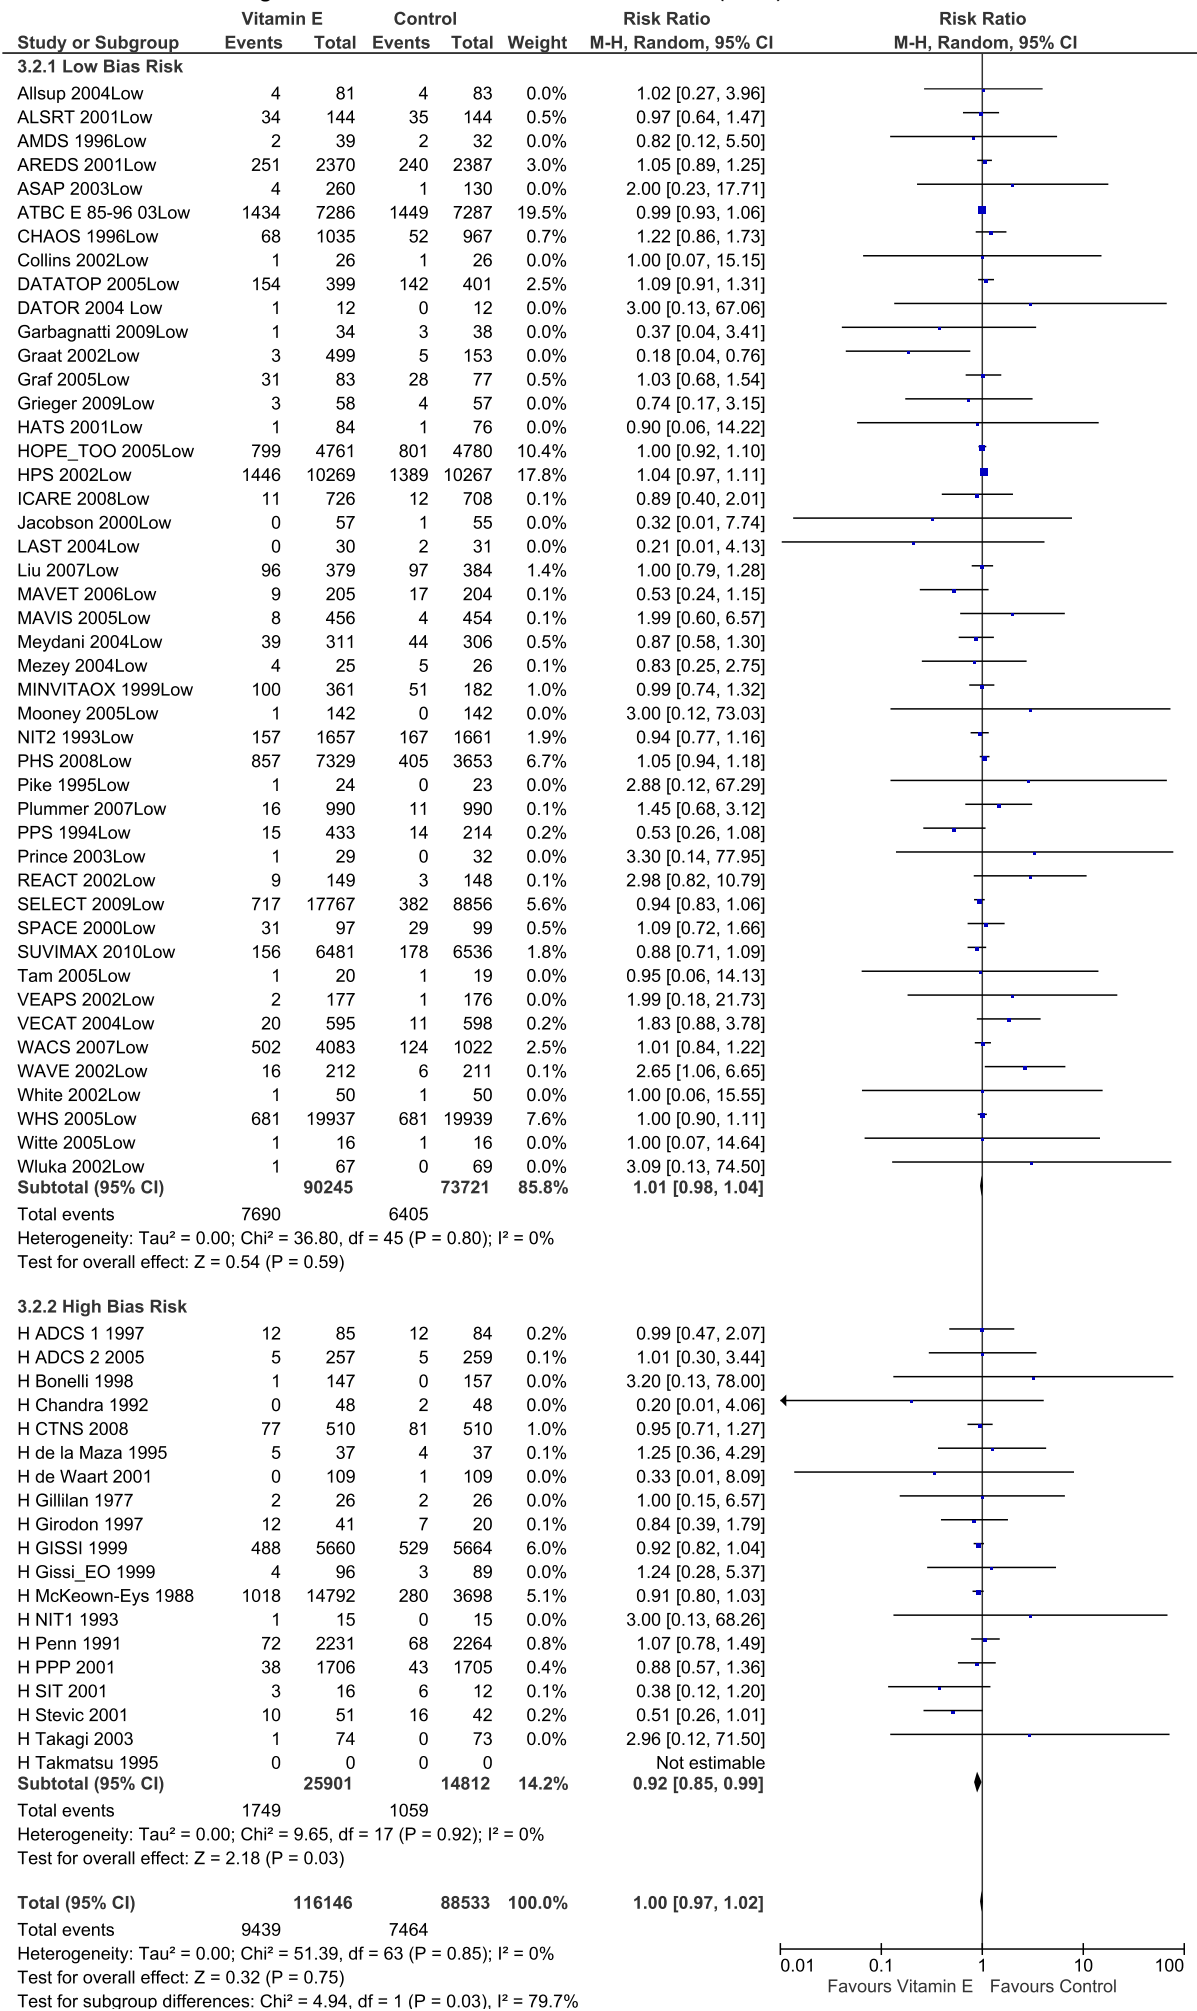

Figure S11 - A11 - ATBC 85-99 "Inside the Table" (2 cell)

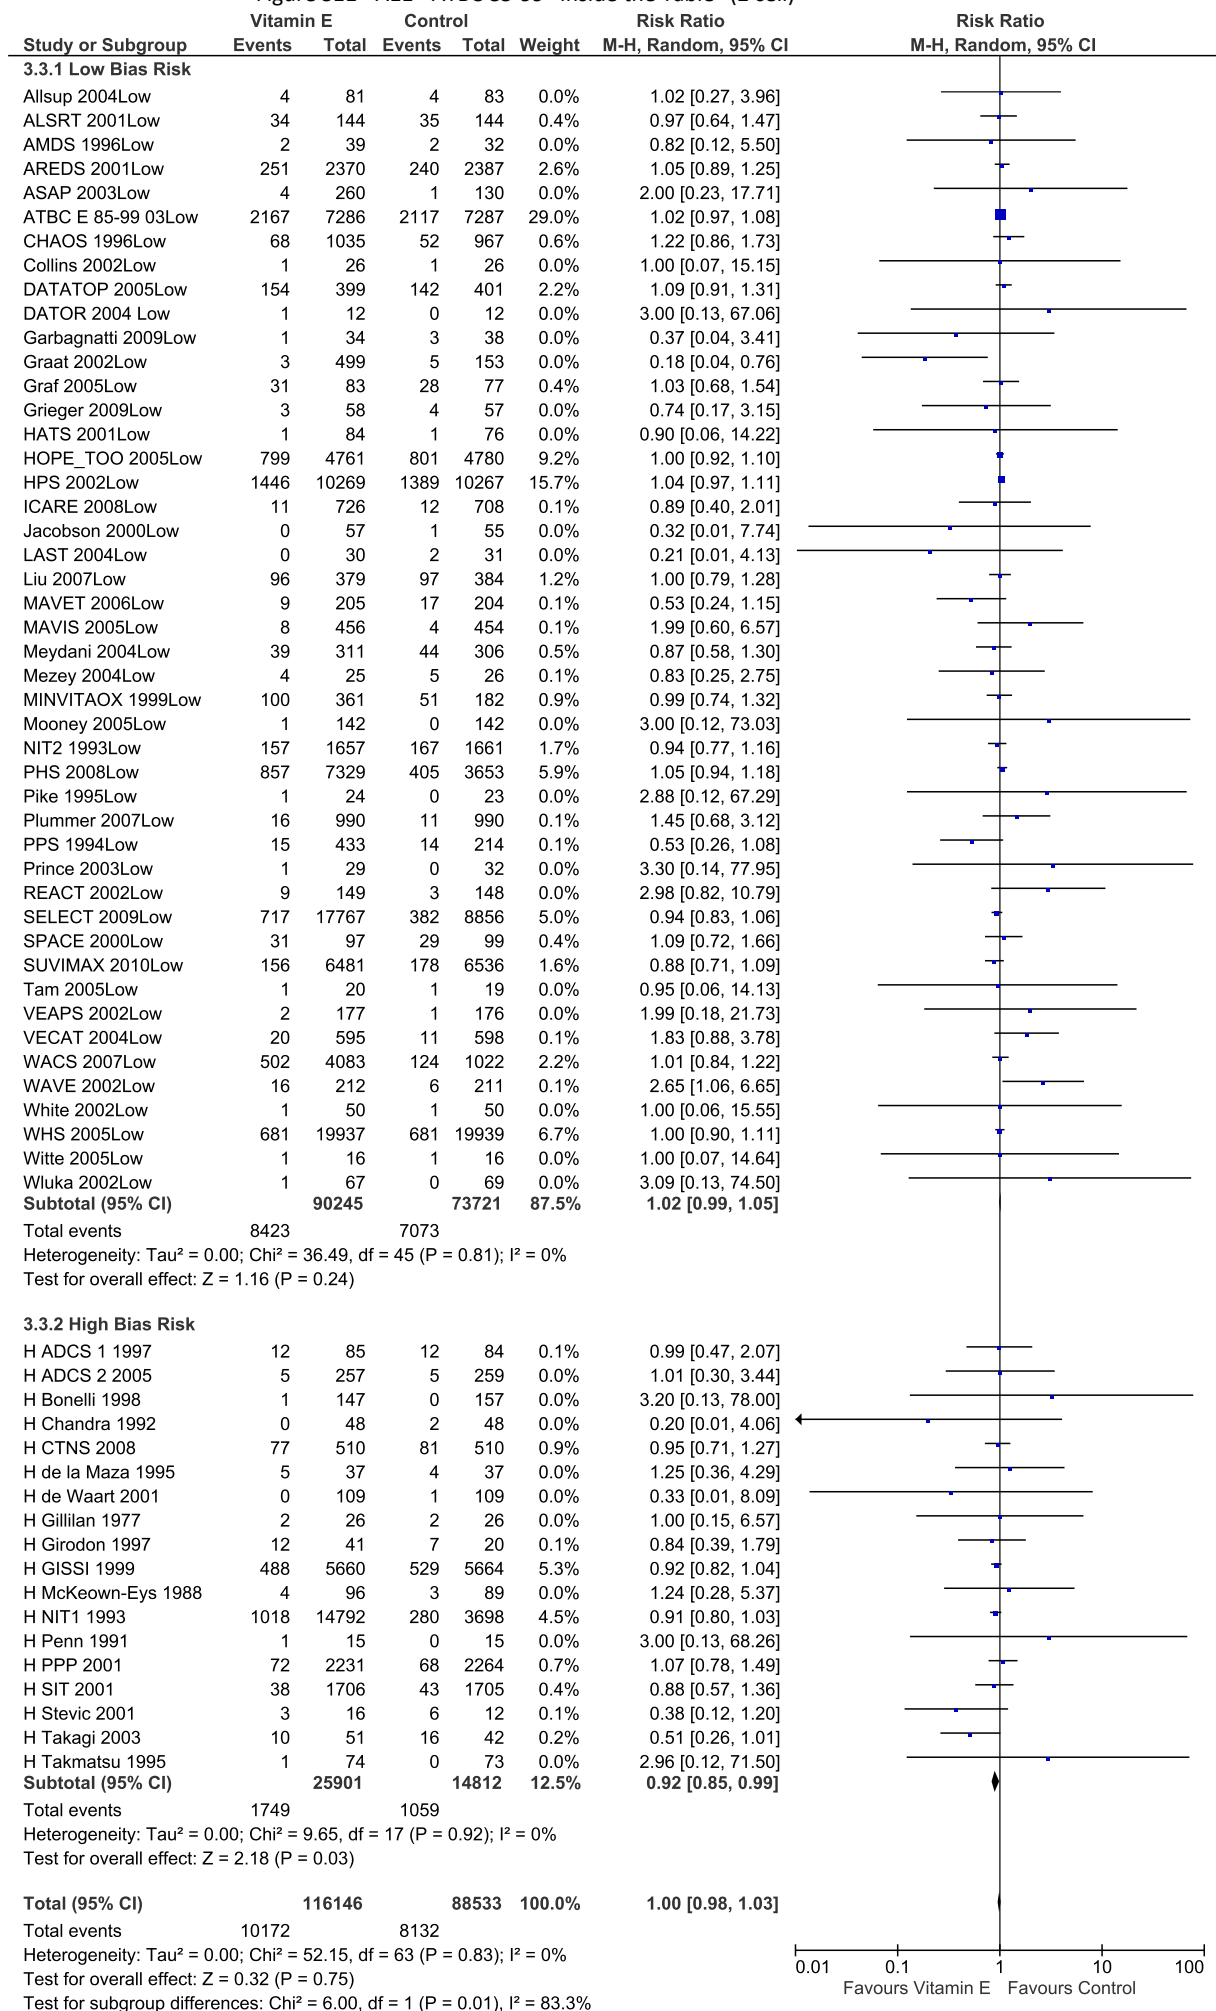

Figure S12 - A11 - ATBC 85-01 "Inside the Table" (2 cell)

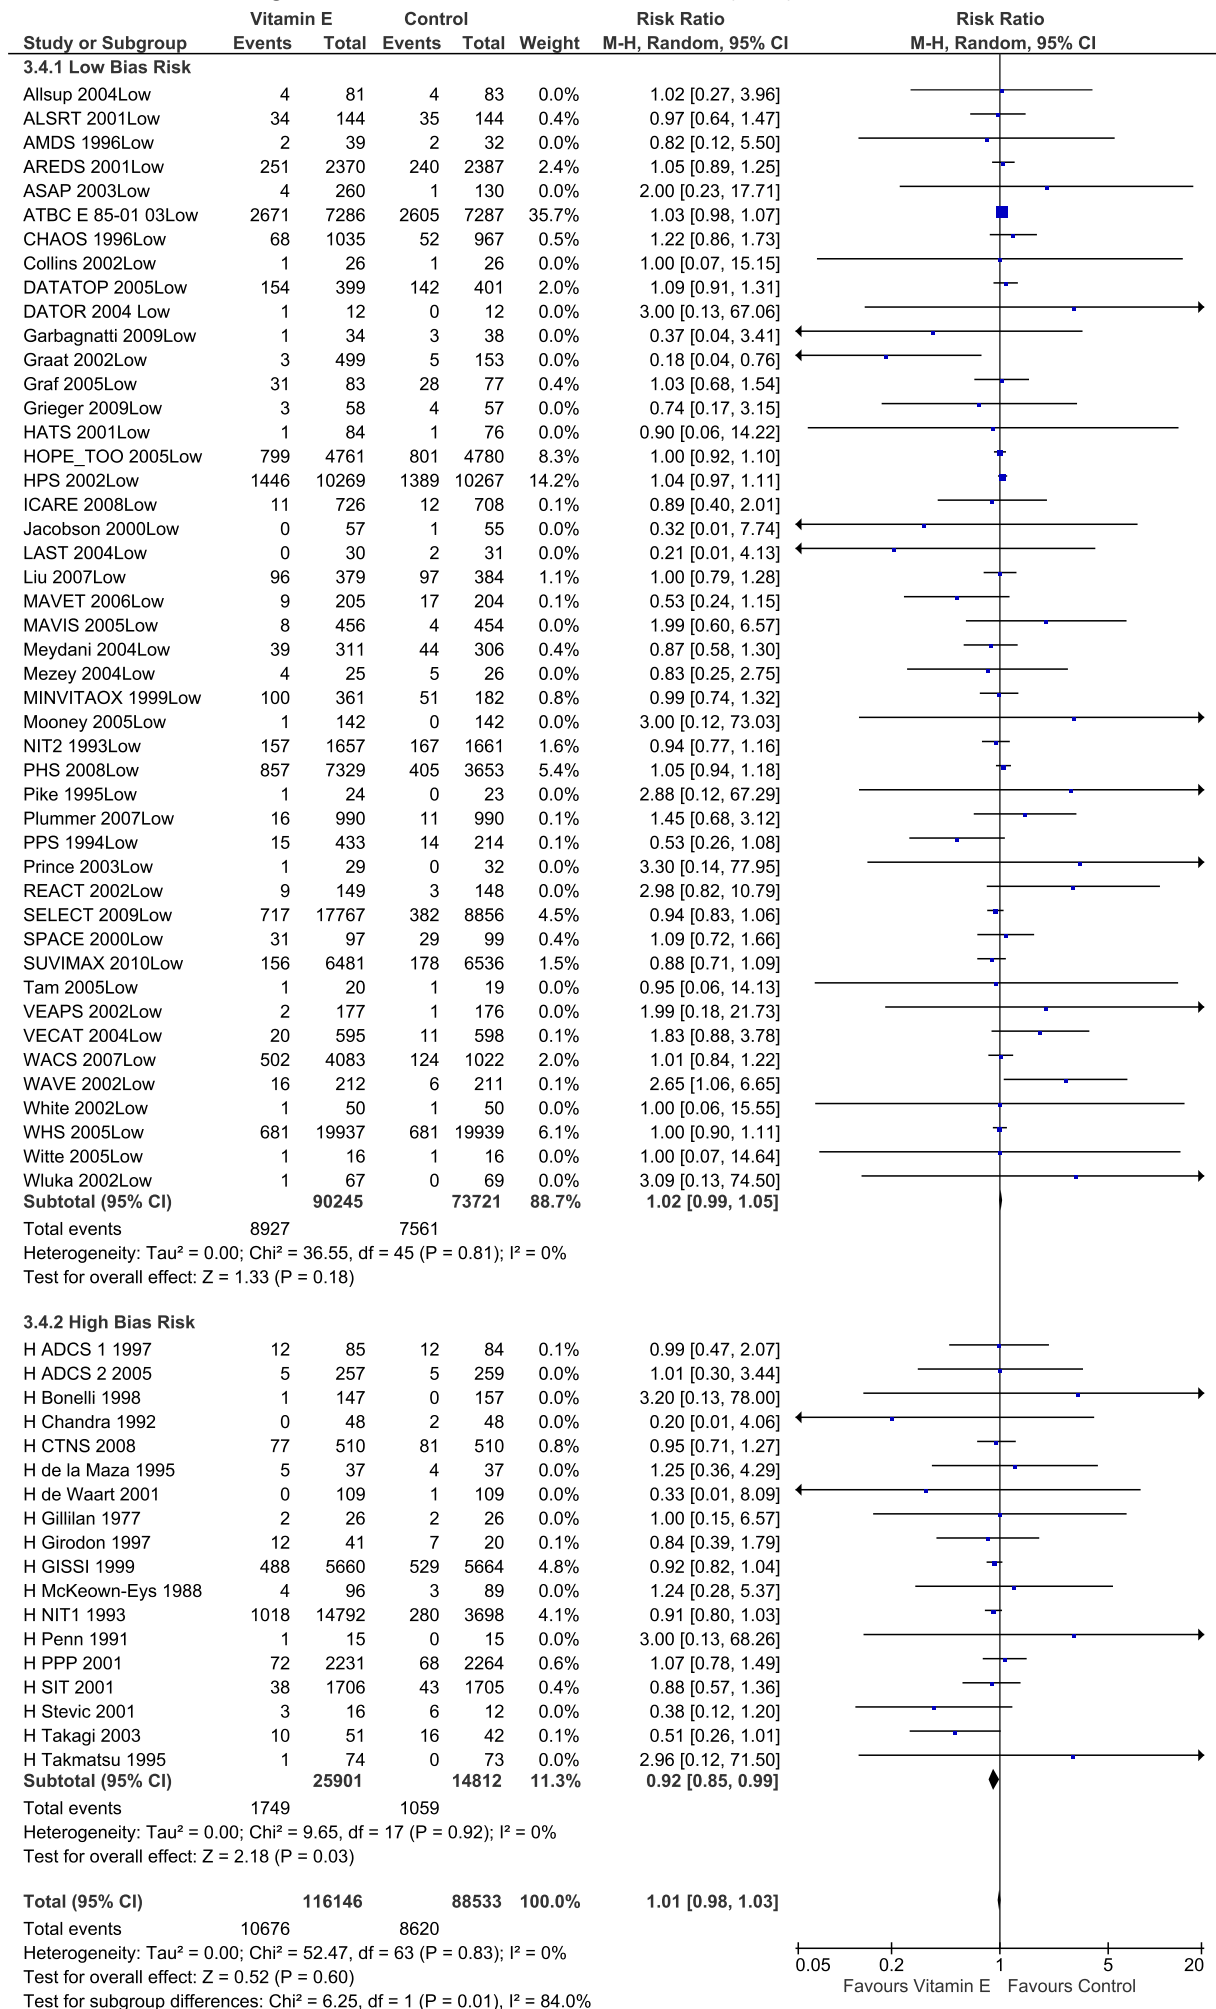

Figure S13 - A11 - ATBC 85-11 "Inside the Table" (2 cell)

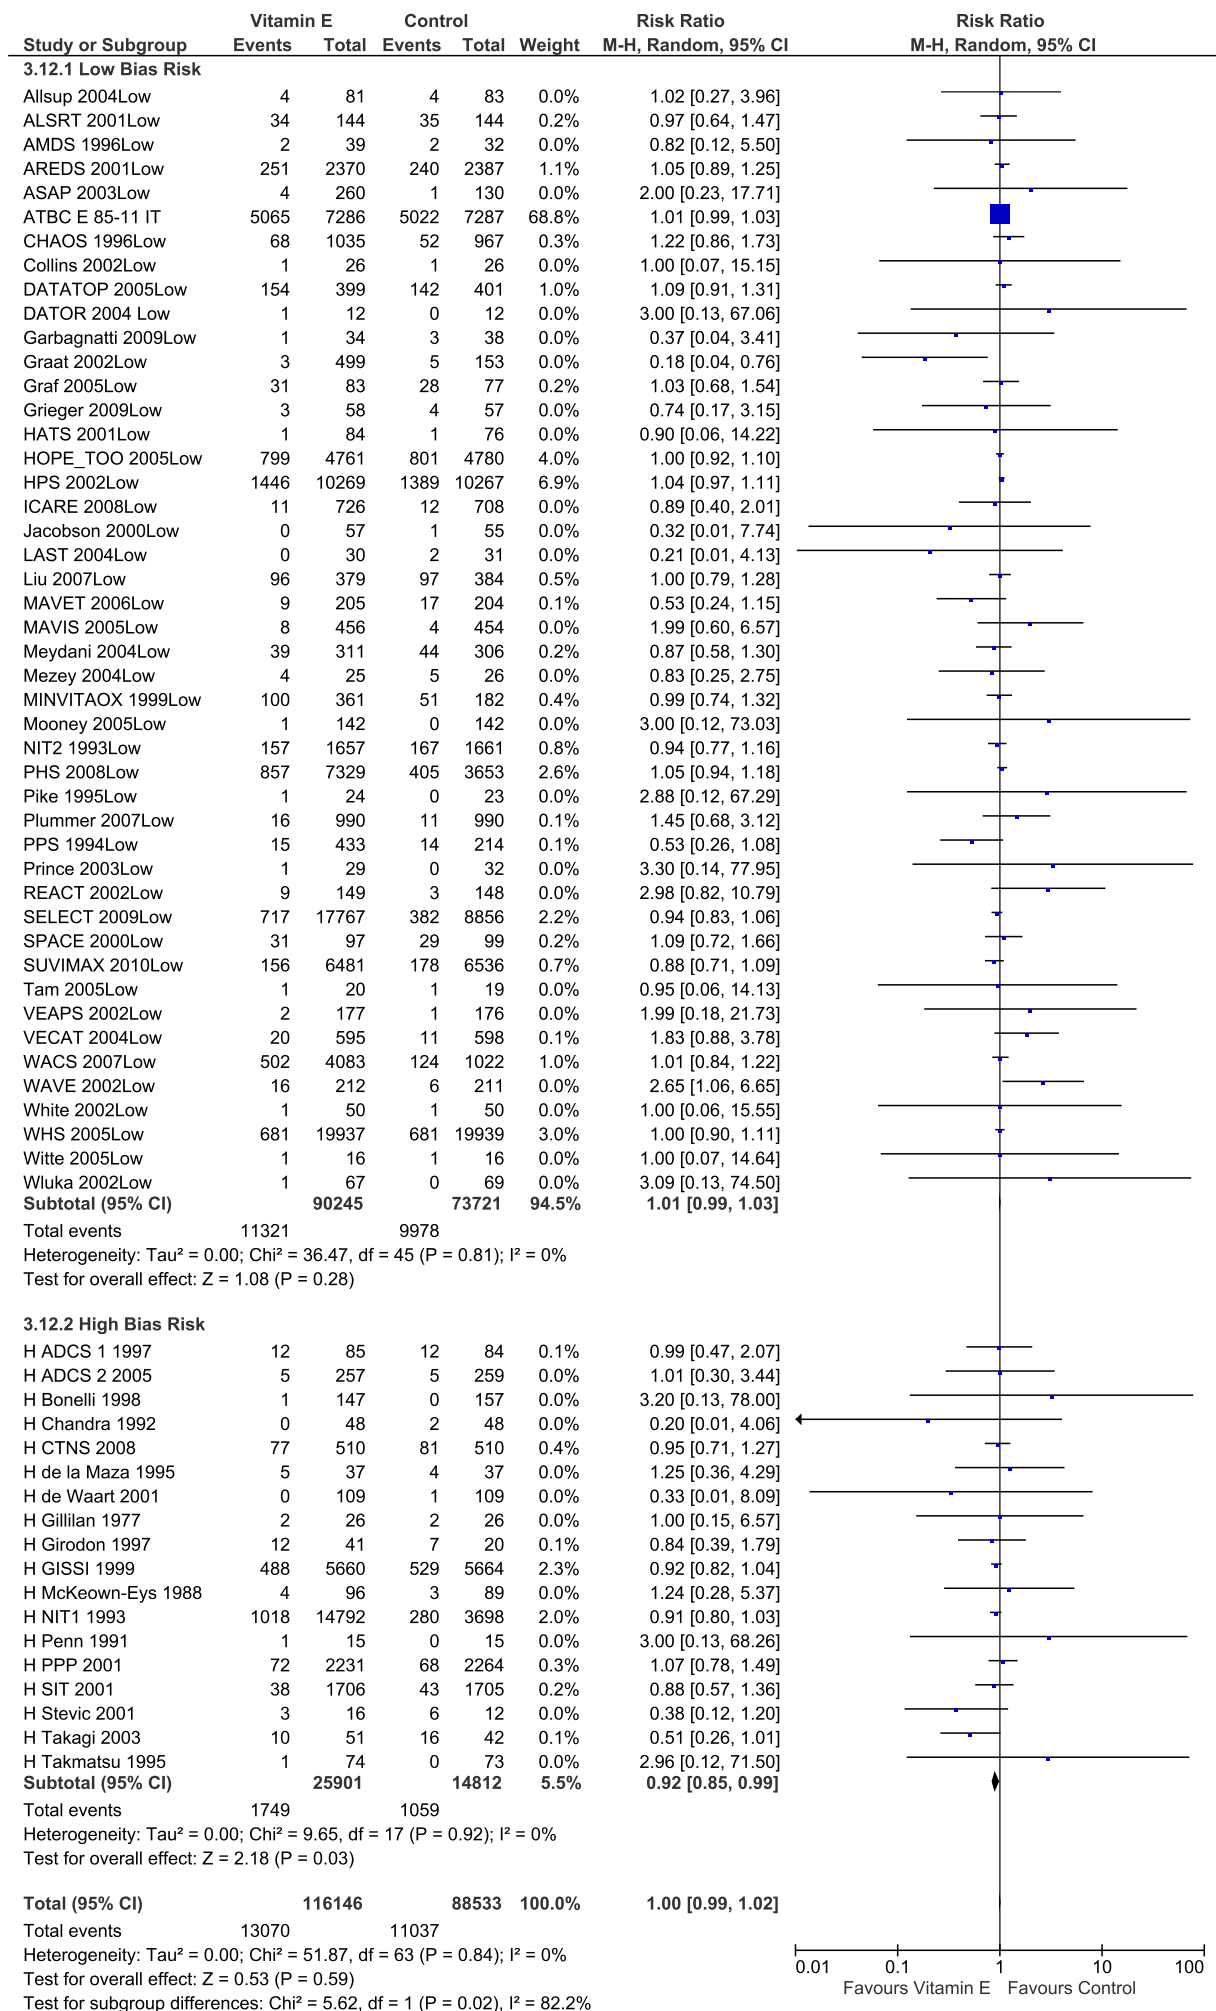

Figure S14 - A11 - ATBC 85-93 Bjelakovic (3 cell)

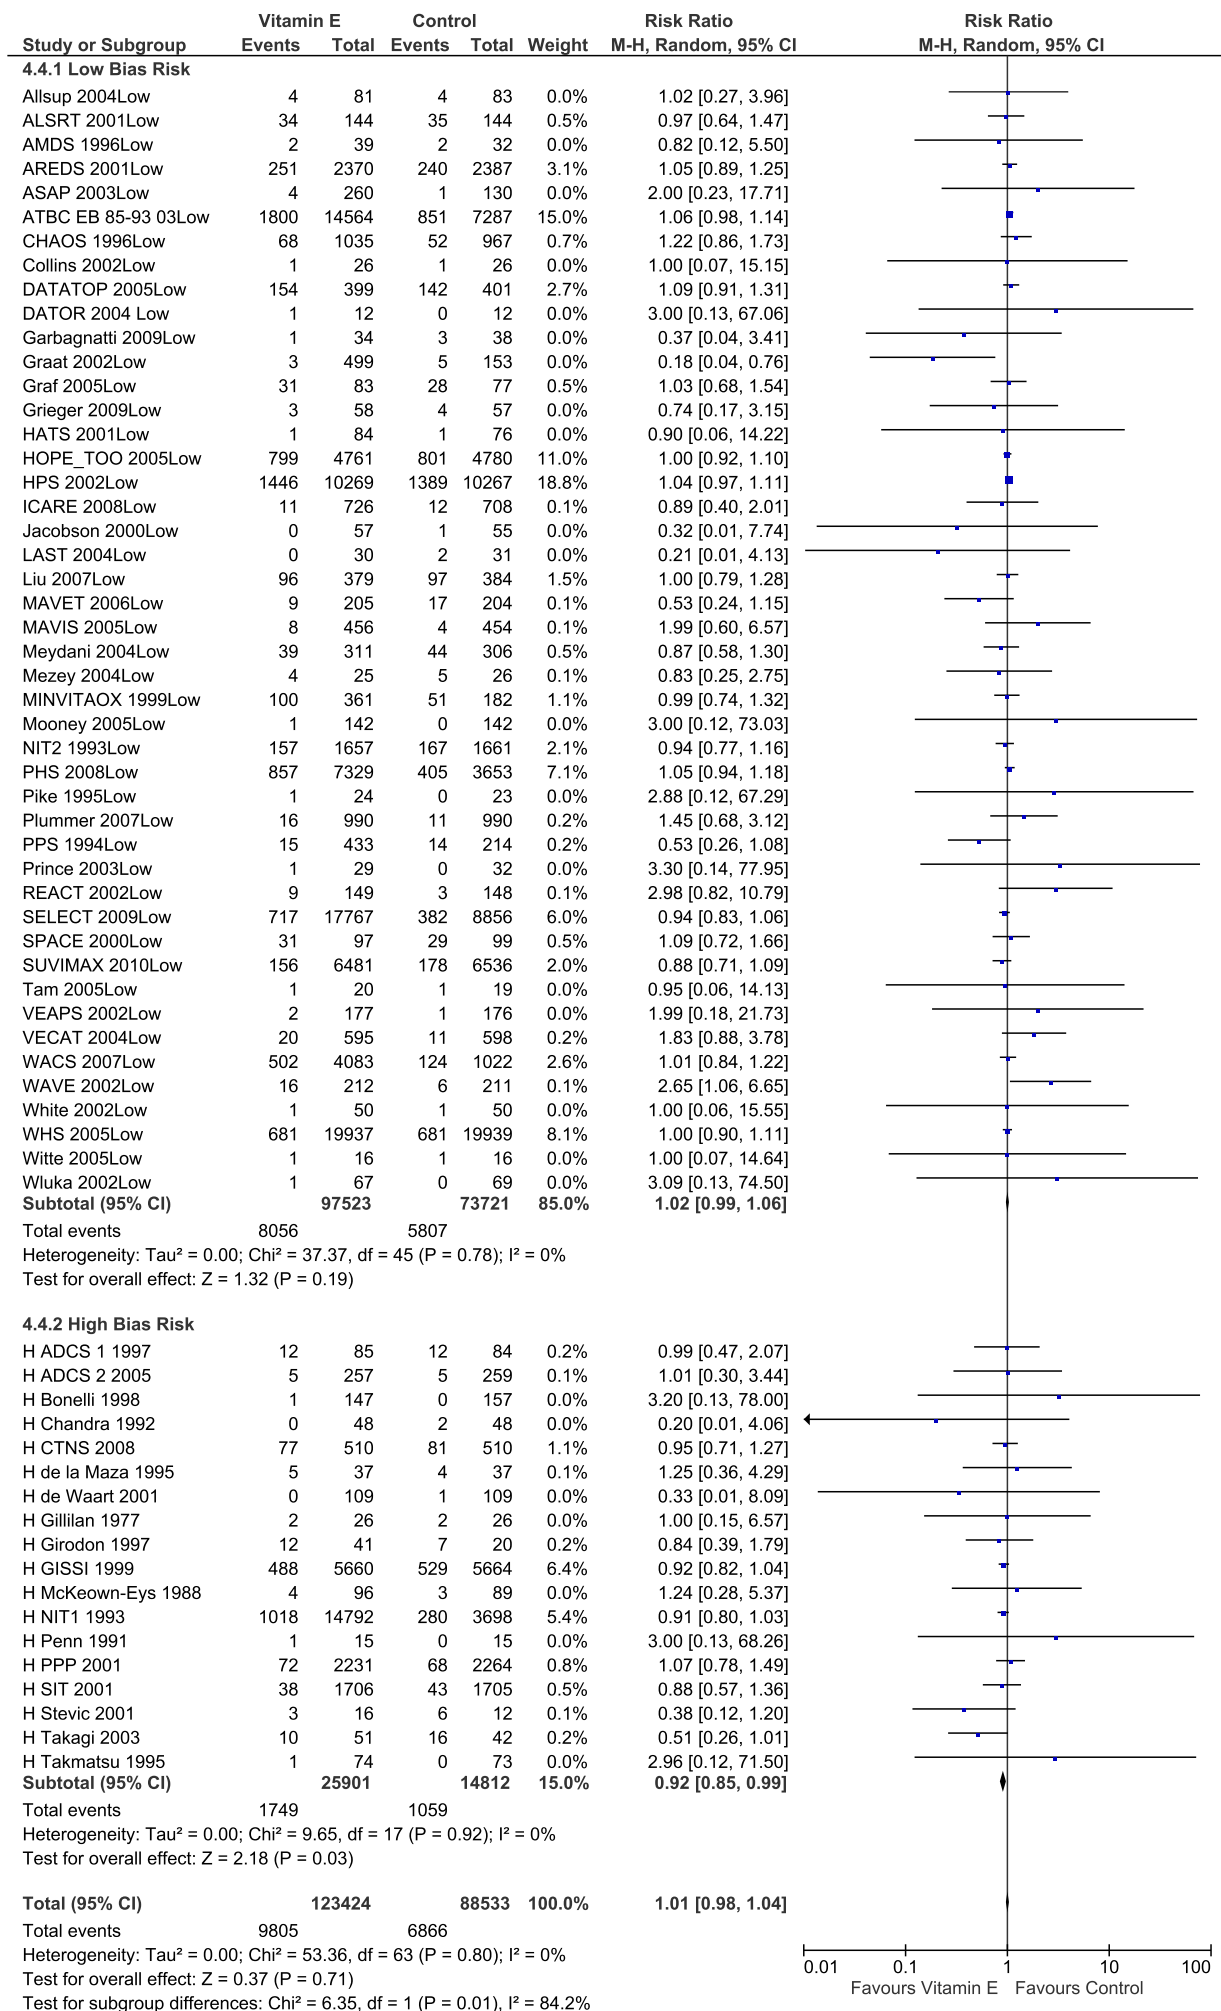

Figure S15 - A11 - ATBC 85-96 Bjelakovic (3 cell)

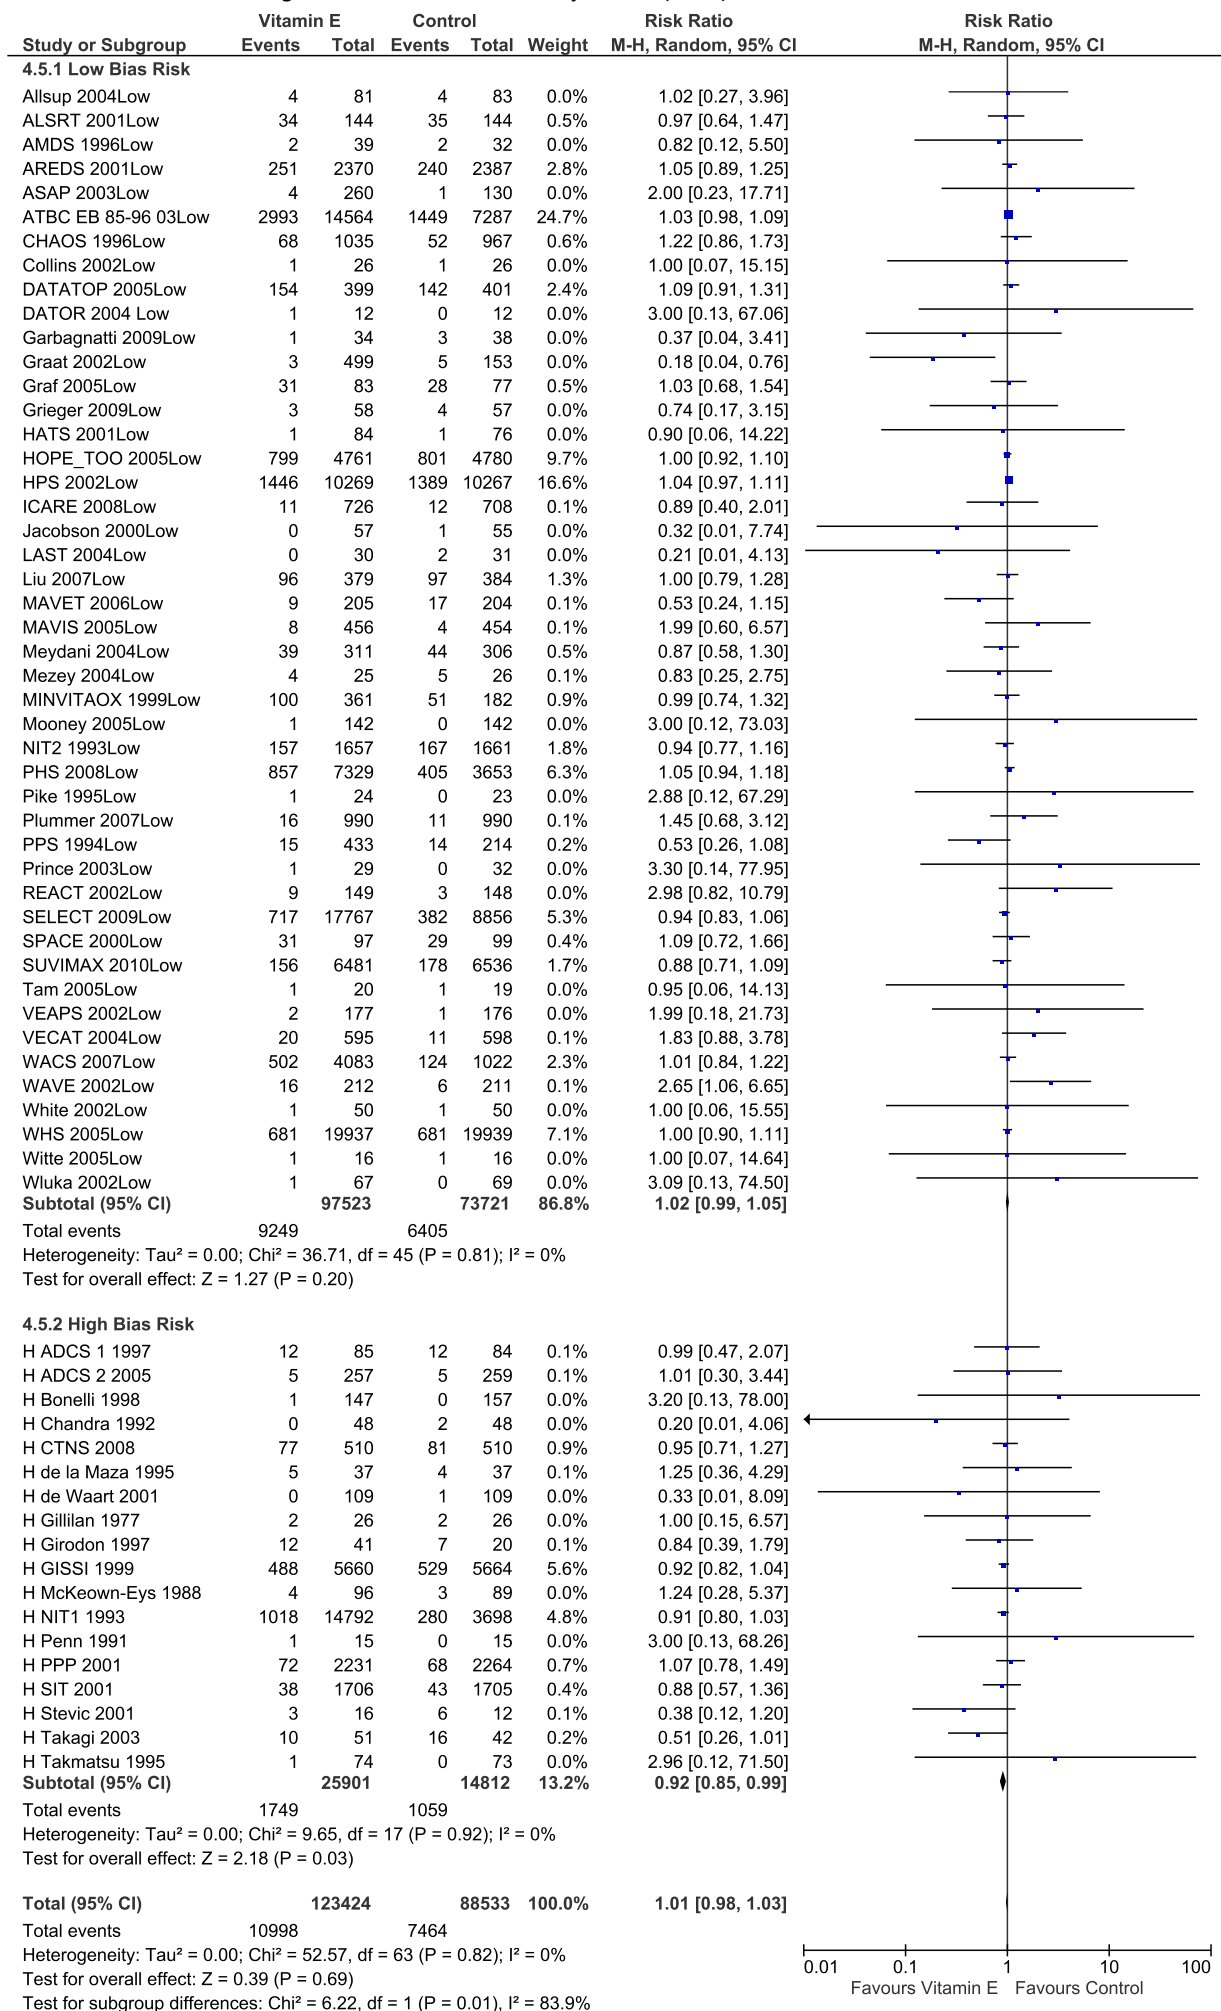

Figure S16 - A11 - ATBC 85-99 Bjelakovic (3 cell)

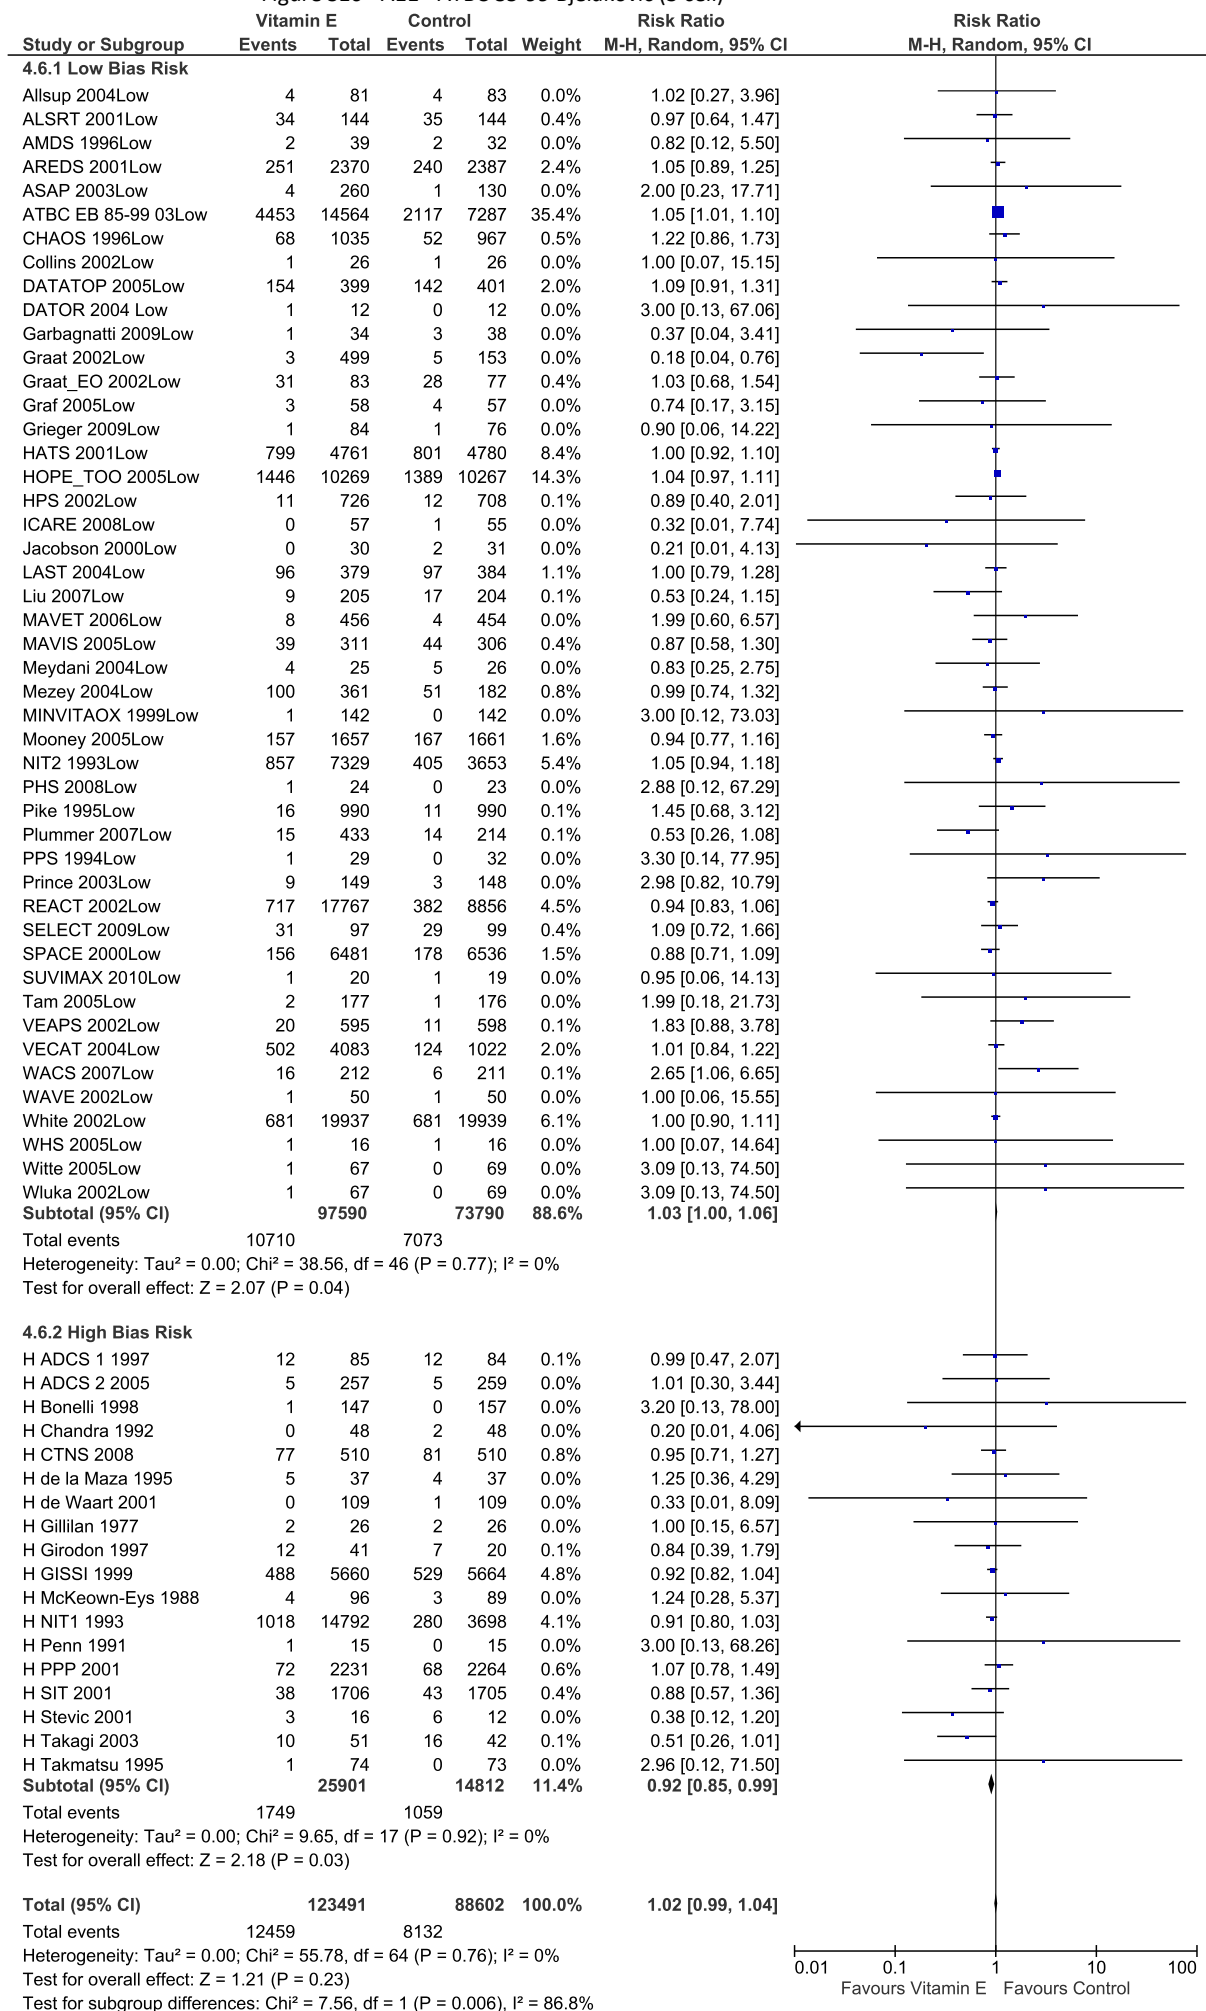



Figure S17 - A11 - ATBC 85-11 Bjelakovic (3 cell)

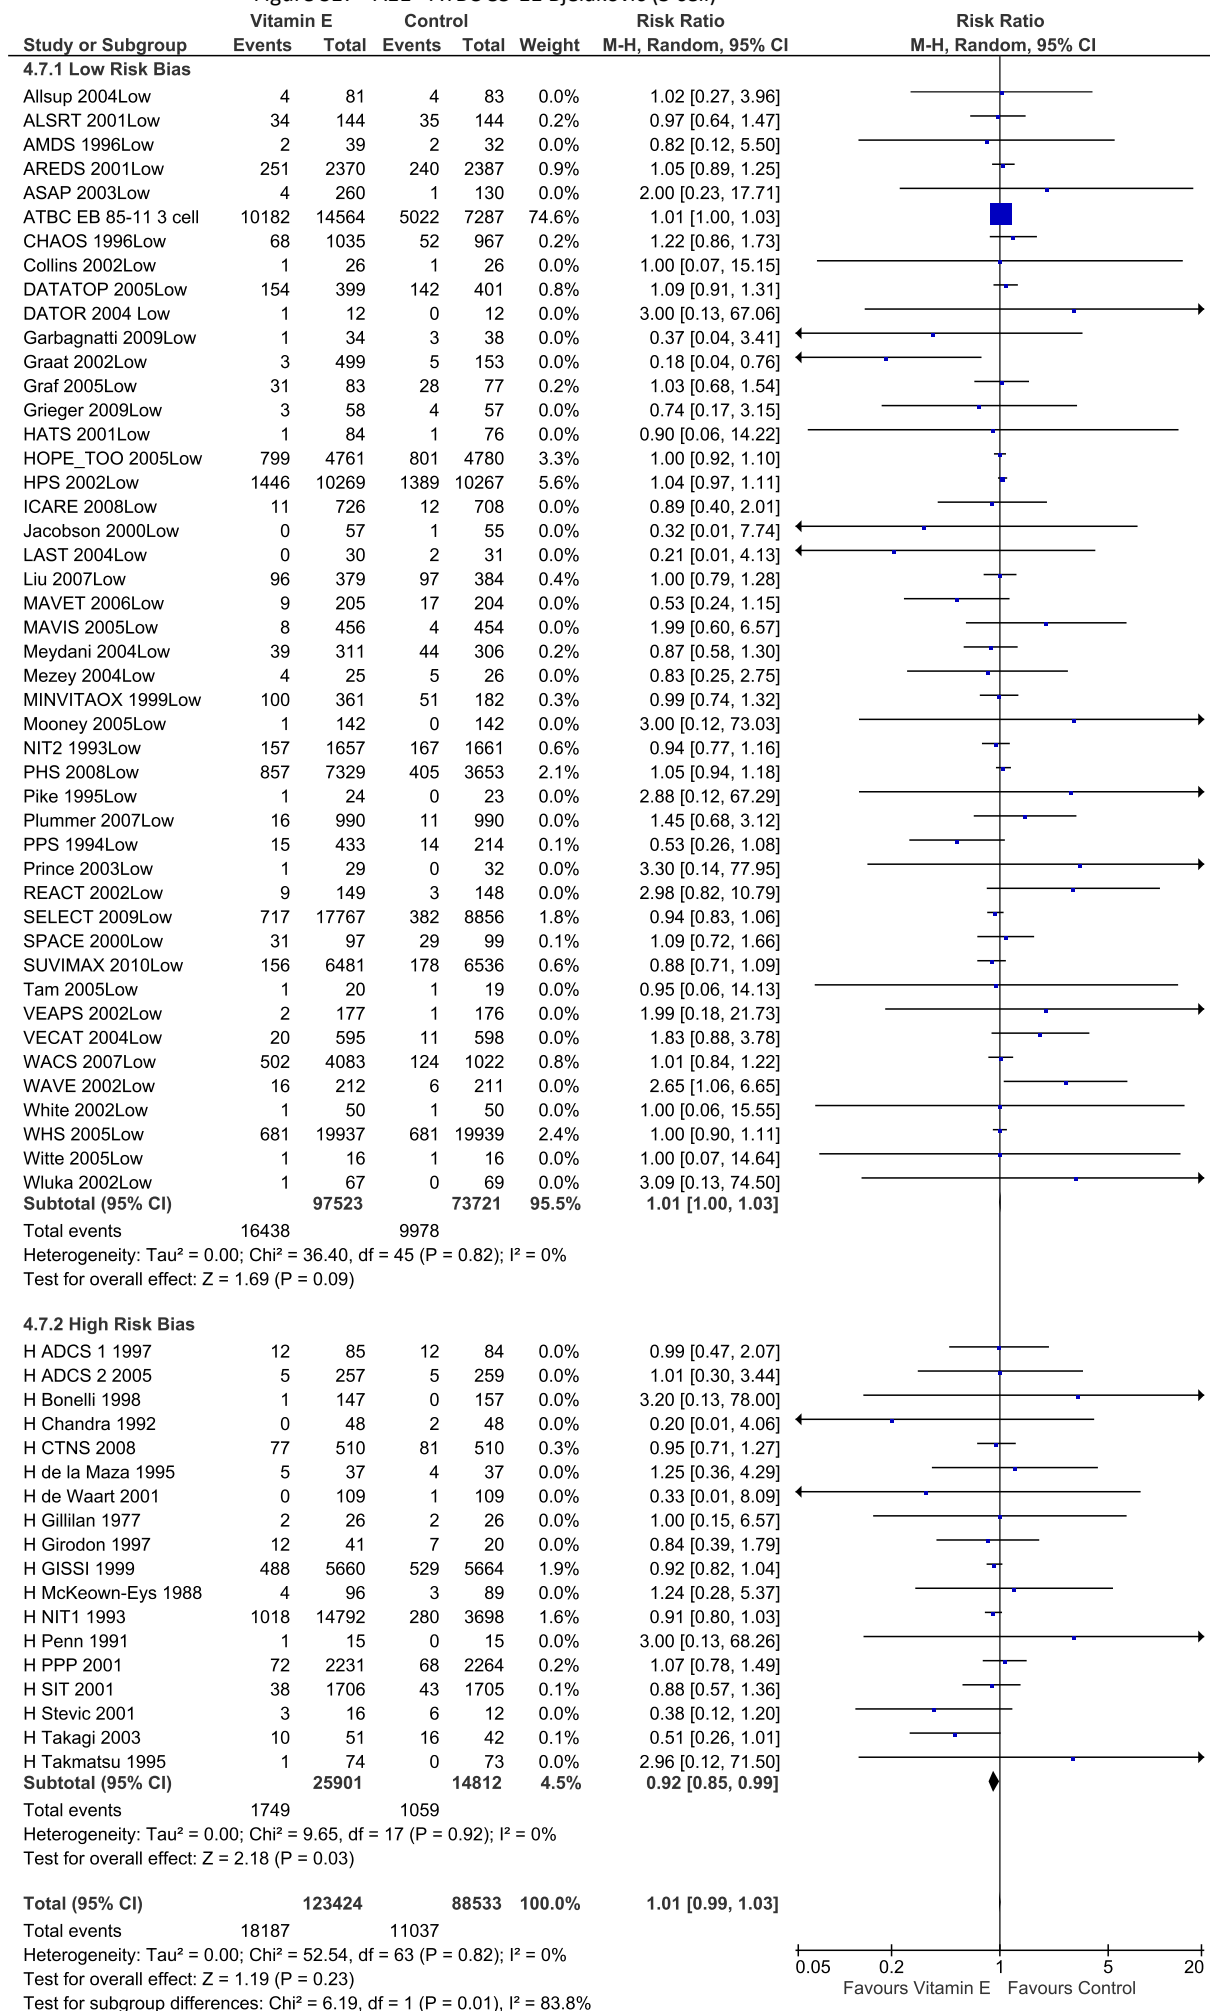

Supplement: MOESM1 [file 14220100]
